# Supplementary material
Source: PubMed Central journal article supplement (PMC3957390)
Supplement: amiajnl-2013-001793-s2.pdf [file amiajnl-2013-001793-s2.pdf]

## Appendix 2: Dosing Rules – Gold Standard Constructs

| ALERT TYPE* | MEDICATION                   | AGE RANGE |      | DOSING_PARAMETER    | GOLD STANDARD |         |
|-------------|------------------------------|-----------|------|---------------------|---------------|---------|
|             |                              | MIN       | MAX  |                     | value         | units   |
| A,C         | ACETAMINOPHEN 325 MG PO TABS | 0         | 29   | DAILY FREQ MAXIMUM  | NO RULE       |         |
| A,C         | ACETAMINOPHEN 325 MG PO TABS | 0         | 29   | DAILY FREQ MINIMUM  | NO RULE       |         |
| A,C         | ACETAMINOPHEN 325 MG PO TABS | 0         | 29   | SINGLE DOSE MAXIMUM | NO RULE       |         |
| A,C         | ACETAMINOPHEN 325 MG PO TABS | 0         | 29   | SINGLE DOSE MINIMUM | NO RULE       |         |
| A,C         | ACETAMINOPHEN 325 MG PO TABS | 0         | 29   | TOTAL DAILY DOSE    | NO RULE       |         |
| A,C         | ACETAMINOPHEN 325 MG PO TABS | 30        | 364  | DAILY FREQ MAXIMUM  | NO RULE       |         |
| A,C         | ACETAMINOPHEN 325 MG PO TABS | 30        | 364  | DAILY FREQ MINIMUM  | NO RULE       |         |
| A,C         | ACETAMINOPHEN 325 MG PO TABS | 30        | 364  | SINGLE DOSE MAXIMUM | NO RULE       |         |
| A,C         | ACETAMINOPHEN 325 MG PO TABS | 30        | 364  | SINGLE DOSE MINIMUM | NO RULE       |         |
| A,C         | ACETAMINOPHEN 325 MG PO TABS | 30        | 364  | TOTAL DAILY DOSE    | NO RULE       |         |
| A,C         | ACETAMINOPHEN 325 MG PO TABS | 365       | 1824 | DAILY FREQ MAXIMUM  | 6             | DOSE(S) |
| A,C         | ACETAMINOPHEN 325 MG PO TABS | 365       | 1824 | DAILY FREQ MINIMUM  | 1             | DOSE(S) |
| A,C         | ACETAMINOPHEN 325 MG PO TABS | 365       | 1824 | SINGLE DOSE MAXIMUM | 15            | MG/KG   |
| A,C         | ACETAMINOPHEN 325 MG PO TABS | 365       | 1824 | SINGLE DOSE MINIMUM | 10            | MG/KG   |
| A,C         | ACETAMINOPHEN 325 MG PO TABS | 365       | 1824 | TOTAL DAILY DOSE    | 75            | MG/KG   |
| A,C         | ACETAMINOPHEN 325 MG PO TABS | 1825      | 2189 | DAILY FREQ MAXIMUM  | 6             | DOSE(S) |
| A,C         | ACETAMINOPHEN 325 MG PO TABS | 1825      | 2189 | DAILY FREQ MINIMUM  | 1             | DOSE(S) |
| A,C         | ACETAMINOPHEN 325 MG PO TABS | 1825      | 2189 | SINGLE DOSE MAXIMUM | 15            | MG/KG   |
| A,C         | ACETAMINOPHEN 325 MG PO TABS | 1825      | 2189 | SINGLE DOSE MINIMUM | 10            | MG/KG   |
| A,C         | ACETAMINOPHEN 325 MG PO TABS | 1825      | 2189 | TOTAL DAILY DOSE    | 75            | MG/KG   |
| A,C         | ACETAMINOPHEN 325 MG PO TABS | 2190      | 4014 | DAILY FREQ MAXIMUM  | 6             | DOSE(S) |
| A,C         | ACETAMINOPHEN 325 MG PO TABS | 2190      | 4014 | DAILY FREQ MINIMUM  | 1             | DOSE(S) |
| A,C         | ACETAMINOPHEN 325 MG PO TABS | 2190      | 4014 | SINGLE DOSE MAXIMUM | 15            | MG/KG   |
| A,C         | ACETAMINOPHEN 325 MG PO TABS | 2190      | 4014 | SINGLE DOSE MINIMUM | 10            | MG/KG   |
| A,C         | ACETAMINOPHEN 325 MG PO TABS | 2190      | 4014 | TOTAL DAILY DOSE    | 75            | MG/KG   |
| A,C         | ACETAMINOPHEN 325 MG PO TABS | 4015      | 4379 | DAILY FREQ MAXIMUM  | 6             | DOSE(S) |
| A,C         | ACETAMINOPHEN 325 MG PO TABS | 4015      | 4379 | DAILY FREQ MINIMUM  | 1             | DOSE(S) |

|     |                                   |      |      |                     |      |         |
|-----|-----------------------------------|------|------|---------------------|------|---------|
| A,C | ACETAMINOPHEN 325 MG PO TABS      | 4015 | 4379 | SINGLE DOSE MAXIMUM | 15   | MG/KG   |
| A,C | ACETAMINOPHEN 325 MG PO TABS      | 4015 | 4379 | SINGLE DOSE MINIMUM | 10   | MG/KG   |
| A,C | ACETAMINOPHEN 325 MG PO TABS      | 4015 | 4379 | TOTAL DAILY DOSE    | 75   | MG/KG   |
| A,C | ACETAMINOPHEN 325 MG PO TABS      | 4380 | 6570 | DAILY FREQ MAXIMUM  | 6    | DOSE(S) |
| A,C | ACETAMINOPHEN 325 MG PO TABS      | 4380 | 6570 | DAILY FREQ MINIMUM  | 1    | DOSE(S) |
| A,C | ACETAMINOPHEN 325 MG PO TABS      | 4380 | 6570 | SINGLE DOSE MAXIMUM | 1000 | MG      |
| A,C | ACETAMINOPHEN 325 MG PO TABS      | 4380 | 6570 | SINGLE DOSE MINIMUM | 325  | MG      |
| A,C | ACETAMINOPHEN 325 MG PO TABS      | 4380 | 6570 | TOTAL DAILY DOSE    | 4000 | MG      |
| A,C | ACETAMINOPHEN 80 MG/0.8ML PO SUSP | 0    | 29   | DAILY FREQ MAXIMUM  | 4    | DOSE(S) |
| A,C | ACETAMINOPHEN 80 MG/0.8ML PO SUSP | 0    | 29   | DAILY FREQ MINIMUM  | 1    | DOSE(S) |
| A,C | ACETAMINOPHEN 80 MG/0.8ML PO SUSP | 0    | 29   | SINGLE DOSE MAXIMUM | 15   | MG/KG   |
| A,C | ACETAMINOPHEN 80 MG/0.8ML PO SUSP | 0    | 29   | SINGLE DOSE MINIMUM | 10   | MG/KG   |
| A,C | ACETAMINOPHEN 80 MG/0.8ML PO SUSP | 0    | 29   | TOTAL DAILY DOSE    | 60   | MG/KG   |
| A,C | ACETAMINOPHEN 80 MG/0.8ML PO SUSP | 30   | 364  | DAILY FREQ MAXIMUM  | 6    | DOSE(S) |
| A,C | ACETAMINOPHEN 80 MG/0.8ML PO SUSP | 30   | 364  | DAILY FREQ MINIMUM  | 1    | DOSE(S) |
| A,C | ACETAMINOPHEN 80 MG/0.8ML PO SUSP | 30   | 364  | SINGLE DOSE MAXIMUM | 15   | MG/KG   |
| A,C | ACETAMINOPHEN 80 MG/0.8ML PO SUSP | 30   | 364  | SINGLE DOSE MINIMUM | 10   | MG/KG   |
| A,C | ACETAMINOPHEN 80 MG/0.8ML PO SUSP | 30   | 364  | TOTAL DAILY DOSE    | 75   | MG/KG   |
| A,C | ACETAMINOPHEN 80 MG/0.8ML PO SUSP | 365  | 729  | DAILY FREQ MAXIMUM  | 6    | DOSE(S) |
| A,C | ACETAMINOPHEN 80 MG/0.8ML PO SUSP | 365  | 729  | DAILY FREQ MINIMUM  | 1    | DOSE(S) |
| A,C | ACETAMINOPHEN 80 MG/0.8ML PO SUSP | 365  | 729  | SINGLE DOSE MAXIMUM | 15   | MG/KG   |
| A,C | ACETAMINOPHEN 80 MG/0.8ML PO SUSP | 365  | 729  | SINGLE DOSE MINIMUM | 10   | MG/KG   |
| A,C | ACETAMINOPHEN 80 MG/0.8ML PO SUSP | 365  | 729  | TOTAL DAILY DOSE    | 75   | MG/KG   |
| A,C | ACETAMINOPHEN 80 MG/0.8ML PO SUSP | 730  | 1824 | DAILY FREQ MAXIMUM  | 6    | DOSE(S) |
| A,C | ACETAMINOPHEN 80 MG/0.8ML PO SUSP | 730  | 1824 | DAILY FREQ MINIMUM  | 1    | DOSE(S) |
| A,C | ACETAMINOPHEN 80 MG/0.8ML PO SUSP | 730  | 1824 | SINGLE DOSE MAXIMUM | 15   | MG/KG   |
| A,C | ACETAMINOPHEN 80 MG/0.8ML PO SUSP | 730  | 1824 | SINGLE DOSE MINIMUM | 10   | MG/KG   |
| A,C | ACETAMINOPHEN 80 MG/0.8ML PO SUSP | 730  | 1824 | TOTAL DAILY DOSE    | 75   | MG/KG   |
| A,C | ACETAMINOPHEN 80 MG/0.8ML PO SUSP | 1825 | 4379 | DAILY FREQ MAXIMUM  | 6    | DOSE(S) |
| A,C | ACETAMINOPHEN 80 MG/0.8ML PO SUSP | 1825 | 4379 | DAILY FREQ MINIMUM  | 1    | DOSE(S) |
| A,C | ACETAMINOPHEN 80 MG/0.8ML PO SUSP | 1825 | 4379 | SINGLE DOSE MAXIMUM | 15   | MG/KG   |
| A,C | ACETAMINOPHEN 80 MG/0.8ML PO SUSP | 1825 | 4379 | SINGLE DOSE MINIMUM | 10   | MG/KG   |
| A,C | ACETAMINOPHEN 80 MG/0.8ML PO SUSP | 1825 | 4379 | TOTAL DAILY DOSE    | 75   | MG/KG   |
| A,C | ACETAMINOPHEN 80 MG/0.8ML PO SUSP | 4380 | 6570 | DAILY FREQ MAXIMUM  | 6    | DOSE(S) |

|     |                                               |      |      |                     |      |         |
|-----|-----------------------------------------------|------|------|---------------------|------|---------|
| A,C | ACETAMINOPHEN 80 MG/0.8ML PO SUSP             | 4380 | 6570 | DAILY FREQ MINIMUM  | 1    | DOSE(S) |
| A,C | ACETAMINOPHEN 80 MG/0.8ML PO SUSP             | 4380 | 6570 | SINGLE DOSE MAXIMUM | 1000 | MG      |
| A,C | ACETAMINOPHEN 80 MG/0.8ML PO SUSP             | 4380 | 6570 | SINGLE DOSE MINIMUM | 325  | MG      |
| A,C | ACETAMINOPHEN 80 MG/0.8ML PO SUSP             | 4380 | 6570 | TOTAL DAILY DOSE    | 4000 | MG      |
| C   | ALBUTEROL SULFATE (2.5 MG/3ML) 0.083% IN NEBU | 0    | 29   | DAILY FREQ MAXIMUM  | 6    | DOSE(S) |
| C   | ALBUTEROL SULFATE (2.5 MG/3ML) 0.083% IN NEBU | 0    | 29   | DAILY FREQ MINIMUM  | 1    | DOSE(S) |
| C   | ALBUTEROL SULFATE (2.5 MG/3ML) 0.083% IN NEBU | 0    | 29   | SINGLE DOSE MAXIMUM | 5    | MG      |
| C   | ALBUTEROL SULFATE (2.5 MG/3ML) 0.083% IN NEBU | 0    | 29   | SINGLE DOSE MINIMUM | 0.63 | MG      |
| C   | ALBUTEROL SULFATE (2.5 MG/3ML) 0.083% IN NEBU | 0    | 29   | TOTAL DAILY DOSE    | 30   | MG      |
| C   | ALBUTEROL SULFATE (2.5 MG/3ML) 0.083% IN NEBU | 30   | 364  | DAILY FREQ MAXIMUM  | 6    | DOSE(S) |
| C   | ALBUTEROL SULFATE (2.5 MG/3ML) 0.083% IN NEBU | 30   | 364  | DAILY FREQ MINIMUM  | 1    | DOSE(S) |
| C   | ALBUTEROL SULFATE (2.5 MG/3ML) 0.083% IN NEBU | 30   | 364  | SINGLE DOSE MAXIMUM | 5    | MG      |
| C   | ALBUTEROL SULFATE (2.5 MG/3ML) 0.083% IN NEBU | 30   | 364  | SINGLE DOSE MINIMUM | 0.63 | MG      |
| C   | ALBUTEROL SULFATE (2.5 MG/3ML) 0.083% IN NEBU | 30   | 364  | TOTAL DAILY DOSE    | 30   | MG      |
| C   | ALBUTEROL SULFATE (2.5 MG/3ML) 0.083% IN NEBU | 365  | 729  | DAILY FREQ MAXIMUM  | 6    | DOSE(S) |
| C   | ALBUTEROL SULFATE (2.5 MG/3ML) 0.083% IN NEBU | 365  | 729  | DAILY FREQ MINIMUM  | 1    | DOSE(S) |
| C   | ALBUTEROL SULFATE (2.5 MG/3ML) 0.083% IN NEBU | 365  | 729  | SINGLE DOSE MAXIMUM | 5    | MG      |
| C   | ALBUTEROL SULFATE (2.5 MG/3ML) 0.083% IN NEBU | 365  | 729  | SINGLE DOSE MINIMUM | 0.63 | MG      |
| C   | ALBUTEROL SULFATE (2.5 MG/3ML) 0.083% IN NEBU | 365  | 729  | TOTAL DAILY DOSE    | 30   | MG      |
| C   | ALBUTEROL SULFATE (2.5 MG/3ML) 0.083% IN NEBU | 730  | 1824 | DAILY FREQ MAXIMUM  | 6    | DOSE(S) |
| C   | ALBUTEROL SULFATE (2.5 MG/3ML) 0.083% IN NEBU | 730  | 1824 | DAILY FREQ MINIMUM  | 1    | DOSE(S) |
| C   | ALBUTEROL SULFATE (2.5 MG/3ML) 0.083% IN NEBU | 730  | 1824 | SINGLE DOSE MAXIMUM | 5    | MG      |
| C   | ALBUTEROL SULFATE (2.5 MG/3ML) 0.083% IN NEBU | 730  | 1824 | SINGLE DOSE MINIMUM | 0.63 | MG      |
| C   | ALBUTEROL SULFATE (2.5 MG/3ML) 0.083% IN NEBU | 730  | 1824 | TOTAL DAILY DOSE    | 30   | MG      |
| C   | ALBUTEROL SULFATE (2.5 MG/3ML) 0.083% IN NEBU | 1825 | 4379 | DAILY FREQ MAXIMUM  | 6    | DOSE(S) |
| C   | ALBUTEROL SULFATE (2.5 MG/3ML) 0.083% IN NEBU | 1825 | 4379 | DAILY FREQ MINIMUM  | 1    | DOSE(S) |
| C   | ALBUTEROL SULFATE (2.5 MG/3ML) 0.083% IN NEBU | 1825 | 4379 | SINGLE DOSE MAXIMUM | 10   | MG      |
| C   | ALBUTEROL SULFATE (2.5 MG/3ML) 0.083% IN NEBU | 1825 | 4379 | SINGLE DOSE MINIMUM | 1.25 | MG      |
| C   | ALBUTEROL SULFATE (2.5 MG/3ML) 0.083% IN NEBU | 1825 | 4379 | TOTAL DAILY DOSE    | 60   | MG      |
| C   | ALBUTEROL SULFATE (2.5 MG/3ML) 0.083% IN NEBU | 4380 | 6570 | DAILY FREQ MAXIMUM  | 24   | DOSE(S) |
| C   | ALBUTEROL SULFATE (2.5 MG/3ML) 0.083% IN NEBU | 4380 | 6570 | DAILY FREQ MINIMUM  | 1    | DOSE(S) |
| C   | ALBUTEROL SULFATE (2.5 MG/3ML) 0.083% IN NEBU | 4380 | 6570 | SINGLE DOSE MAXIMUM | 10   | MG      |
| C   | ALBUTEROL SULFATE (2.5 MG/3ML) 0.083% IN NEBU | 4380 | 6570 | SINGLE DOSE MINIMUM | 1.25 | MG      |
| C   | ALBUTEROL SULFATE (2.5 MG/3ML) 0.083% IN NEBU | 4380 | 6570 | TOTAL DAILY DOSE    | 360  | MG      |

|   |                                                     |      |      |                     |         |          |
|---|-----------------------------------------------------|------|------|---------------------|---------|----------|
| C | ALBUTEROL SULFATE HFA 108 (90 BASE) MCG/ACT IN AERS | 0    | 89   | DAILY FREQ MAXIMUM  | NO RULE |          |
| C | ALBUTEROL SULFATE HFA 108 (90 BASE) MCG/ACT IN AERS | 0    | 89   | DAILY FREQ MINIMUM  | NO RULE |          |
| C | ALBUTEROL SULFATE HFA 108 (90 BASE) MCG/ACT IN AERS | 0    | 89   | SINGLE DOSE MAXIMUM | NO RULE |          |
| C | ALBUTEROL SULFATE HFA 108 (90 BASE) MCG/ACT IN AERS | 0    | 89   | SINGLE DOSE MINIMUM | NO RULE |          |
| C | ALBUTEROL SULFATE HFA 108 (90 BASE) MCG/ACT IN AERS | 0    | 89   | TOTAL DAILY DOSE    | NO RULE |          |
| C | ALBUTEROL SULFATE HFA 108 (90 BASE) MCG/ACT IN AERS | 90   | 364  | DAILY FREQ MAXIMUM  | 6       | DOSE(S)  |
| C | ALBUTEROL SULFATE HFA 108 (90 BASE) MCG/ACT IN AERS | 90   | 364  | DAILY FREQ MINIMUM  | 1       | DOSE(S)  |
| C | ALBUTEROL SULFATE HFA 108 (90 BASE) MCG/ACT IN AERS | 90   | 364  | SINGLE DOSE MAXIMUM | 2       | PUFF(S)  |
| C | ALBUTEROL SULFATE HFA 108 (90 BASE) MCG/ACT IN AERS | 90   | 364  | SINGLE DOSE MINIMUM | 1       | PUFF(S)  |
| C | ALBUTEROL SULFATE HFA 108 (90 BASE) MCG/ACT IN AERS | 90   | 364  | TOTAL DAILY DOSE    | 12      | PUFF(S)  |
| C | ALBUTEROL SULFATE HFA 108 (90 BASE) MCG/ACT IN AERS | 365  | 1459 | DAILY FREQ MAXIMUM  | 6       | DOSE(S)  |
| C | ALBUTEROL SULFATE HFA 108 (90 BASE) MCG/ACT IN AERS | 365  | 1459 | DAILY FREQ MINIMUM  | 1       | DOSE(S)  |
| C | ALBUTEROL SULFATE HFA 108 (90 BASE) MCG/ACT IN AERS | 365  | 1459 | SINGLE DOSE MAXIMUM | 2       | PUFF(S)  |
| C | ALBUTEROL SULFATE HFA 108 (90 BASE) MCG/ACT IN AERS | 365  | 1459 | SINGLE DOSE MINIMUM | 1       | PUFF(S)  |
| C | ALBUTEROL SULFATE HFA 108 (90 BASE) MCG/ACT IN AERS | 365  | 1459 | TOTAL DAILY DOSE    | 12      | PUFF(S)  |
| C | ALBUTEROL SULFATE HFA 108 (90 BASE) MCG/ACT IN AERS | 1460 | 4379 | DAILY FREQ MAXIMUM  | 24      | DOSE(S)  |
| C | ALBUTEROL SULFATE HFA 108 (90 BASE) MCG/ACT IN AERS | 1460 | 4379 | DAILY FREQ MINIMUM  | 1       | DOSE(S)  |
| C | ALBUTEROL SULFATE HFA 108 (90 BASE) MCG/ACT IN AERS | 1460 | 4379 | SINGLE DOSE MAXIMUM | 8       | PUFF(S)  |
| C | ALBUTEROL SULFATE HFA 108 (90 BASE) MCG/ACT IN AERS | 1460 | 4379 | SINGLE DOSE MINIMUM | 2       | PUFF(S)  |
| C | ALBUTEROL SULFATE HFA 108 (90 BASE) MCG/ACT IN AERS | 1460 | 4379 | TOTAL DAILY DOSE    | 192     | PUFF(S)  |
| C | ALBUTEROL SULFATE HFA 108 (90 BASE) MCG/ACT IN AERS | 4380 | 6570 | DAILY FREQ MAXIMUM  | 24      | DOSE(S)  |
| C | ALBUTEROL SULFATE HFA 108 (90 BASE) MCG/ACT IN AERS | 4380 | 6570 | DAILY FREQ MINIMUM  | 1       | DOSE(S)  |
| C | ALBUTEROL SULFATE HFA 108 (90 BASE) MCG/ACT IN AERS | 4380 | 6570 | SINGLE DOSE MAXIMUM | 8       | PUFF(S)  |
| C | ALBUTEROL SULFATE HFA 108 (90 BASE) MCG/ACT IN AERS | 4380 | 6570 | SINGLE DOSE MINIMUM | 2       | PUFF(S)  |
| C | ALBUTEROL SULFATE HFA 108 (90 BASE) MCG/ACT IN AERS | 4380 | 6570 | TOTAL DAILY DOSE    | 192     | PUFF(S)  |
| B | ANTIHEMOPHILIC FACTOR-VWF                           | 0    | 29   | DAILY FREQ MAXIMUM  | 3       | DOSE(S)  |
| B | ANTIHEMOPHILIC FACTOR-VWF                           | 0    | 29   | DAILY FREQ MINIMUM  | 1       | DOSE(S)  |
| B | ANTIHEMOPHILIC FACTOR-VWF                           | 0    | 29   | SINGLE DOSE MAXIMUM | 25      | UNITS/KG |
| B | ANTIHEMOPHILIC FACTOR-VWF                           | 0    | 29   | SINGLE DOSE MINIMUM | 7.5     | UNITS/KG |
| B | ANTIHEMOPHILIC FACTOR-VWF                           | 0    | 29   | TOTAL DAILY DOSE    | 75      | UNITS/KG |
| B | ANTIHEMOPHILIC FACTOR-VWF                           | 30   | 6570 | DAILY FREQ MAXIMUM  | 3       | DOSE(S)  |
| B | ANTIHEMOPHILIC FACTOR-VWF                           | 30   | 6570 | DAILY FREQ MINIMUM  | 1       | DOSE(S)  |
| B | ANTIHEMOPHILIC FACTOR-VWF                           | 30   | 6570 | SINGLE DOSE MAXIMUM | 25      | UNITS/KG |
| B | ANTIHEMOPHILIC FACTOR-VWF                           | 30   | 6570 | SINGLE DOSE MINIMUM | 7.5     | UNITS/KG |

|   |                                     |      |      |                     |         |          |
|---|-------------------------------------|------|------|---------------------|---------|----------|
| B | ANTIHEMOPHILIC FACTOR-VWF           | 30   | 6570 | TOTAL DAILY DOSE    | 75      | UNITS/KG |
| B | ASPIRIN CHEW TAB 81 MG              | 0    | 89   | DAILY FREQ MAXIMUM  | NO RULE |          |
| B | ASPIRIN CHEW TAB 81 MG              | 0    | 89   | DAILY FREQ MINIMUM  | NO RULE |          |
| B | ASPIRIN CHEW TAB 81 MG              | 0    | 89   | SINGLE DOSE MAXIMUM | NO RULE |          |
| B | ASPIRIN CHEW TAB 81 MG              | 0    | 89   | SINGLE DOSE MINIMUM | NO RULE |          |
| B | ASPIRIN CHEW TAB 81 MG              | 0    | 89   | TOTAL DAILY DOSE    | NO RULE |          |
| B | ASPIRIN CHEW TAB 81 MG              | 90   | 364  | DAILY FREQ MAXIMUM  | 1       | DOSE(S)  |
| B | ASPIRIN CHEW TAB 81 MG              | 90   | 364  | DAILY FREQ MINIMUM  | 1       | DOSE(S)  |
| B | ASPIRIN CHEW TAB 81 MG              | 90   | 364  | SINGLE DOSE MAXIMUM | 5       | MG/KG    |
| B | ASPIRIN CHEW TAB 81 MG              | 90   | 364  | SINGLE DOSE MINIMUM | 3       | MG/KG    |
| B | ASPIRIN CHEW TAB 81 MG              | 90   | 364  | TOTAL DAILY DOSE    | 5       | MG/KG    |
| B | ASPIRIN CHEW TAB 81 MG              | 365  | 4379 | DAILY FREQ MAXIMUM  | 6       | DOSE(S)  |
| B | ASPIRIN CHEW TAB 81 MG              | 365  | 4379 | DAILY FREQ MINIMUM  | 1       | DOSE(S)  |
| B | ASPIRIN CHEW TAB 81 MG              | 365  | 4379 | SINGLE DOSE MAXIMUM | 32.5    | MG/KG    |
| B | ASPIRIN CHEW TAB 81 MG              | 365  | 4379 | SINGLE DOSE MINIMUM | 3       | MG/KG    |
| B | ASPIRIN CHEW TAB 81 MG              | 365  | 4379 | TOTAL DAILY DOSE    | 130     | MG/KG    |
| B | ASPIRIN CHEW TAB 81 MG              | 4380 | 6570 | DAILY FREQ MAXIMUM  | 6       | DOSE(S)  |
| B | ASPIRIN CHEW TAB 81 MG              | 4380 | 6570 | DAILY FREQ MINIMUM  | 1       | DOSE(S)  |
| B | ASPIRIN CHEW TAB 81 MG              | 4380 | 6570 | SINGLE DOSE MAXIMUM | 1000    | MG       |
| B | ASPIRIN CHEW TAB 81 MG              | 4380 | 6570 | SINGLE DOSE MINIMUM | 50      | MG       |
| B | ASPIRIN CHEW TAB 81 MG              | 4380 | 6570 | TOTAL DAILY DOSE    | 5400    | MG       |
| C | BUPIVACAINE HCL (PF) 0.25 % IJ SOLN | 0    | 29   | DAILY FREQ MAXIMUM  | NO RULE |          |
| C | BUPIVACAINE HCL (PF) 0.25 % IJ SOLN | 0    | 29   | DAILY FREQ MINIMUM  | NO RULE |          |
| C | BUPIVACAINE HCL (PF) 0.25 % IJ SOLN | 0    | 29   | SINGLE DOSE MAXIMUM | NO RULE |          |
| C | BUPIVACAINE HCL (PF) 0.25 % IJ SOLN | 0    | 29   | SINGLE DOSE MINIMUM | NO RULE |          |
| C | BUPIVACAINE HCL (PF) 0.25 % IJ SOLN | 0    | 29   | TOTAL DAILY DOSE    | NO RULE |          |
| C | BUPIVACAINE HCL (PF) 0.25 % IJ SOLN | 30   | 119  | DAILY FREQ MAXIMUM  | NO RULE |          |
| C | BUPIVACAINE HCL (PF) 0.25 % IJ SOLN | 30   | 119  | DAILY FREQ MINIMUM  | NO RULE |          |
| C | BUPIVACAINE HCL (PF) 0.25 % IJ SOLN | 30   | 119  | SINGLE DOSE MAXIMUM | NO RULE |          |
| C | BUPIVACAINE HCL (PF) 0.25 % IJ SOLN | 30   | 119  | SINGLE DOSE MINIMUM | NO RULE |          |
| C | BUPIVACAINE HCL (PF) 0.25 % IJ SOLN | 30   | 119  | TOTAL DAILY DOSE    | NO RULE |          |
| C | BUPIVACAINE HCL (PF) 0.25 % IJ SOLN | 120  | 364  | DAILY FREQ MAXIMUM  | NO RULE |          |
| C | BUPIVACAINE HCL (PF) 0.25 % IJ SOLN | 120  | 364  | DAILY FREQ MINIMUM  | NO RULE |          |
| C | BUPIVACAINE HCL (PF) 0.25 % IJ SOLN | 120  | 364  | SINGLE DOSE MAXIMUM | NO RULE |          |

|   |                                     |      |      |                     |         |         |
|---|-------------------------------------|------|------|---------------------|---------|---------|
| C | BUPIVACAINE HCL (PF) 0.25 % IJ SOLN | 120  | 364  | SINGLE DOSE MINIMUM | NO RULE |         |
| C | BUPIVACAINE HCL (PF) 0.25 % IJ SOLN | 120  | 364  | TOTAL DAILY DOSE    | NO RULE |         |
| C | BUPIVACAINE HCL (PF) 0.25 % IJ SOLN | 365  | 4379 | DAILY FREQ MAXIMUM  | NO RULE |         |
| C | BUPIVACAINE HCL (PF) 0.25 % IJ SOLN | 365  | 4379 | DAILY FREQ MINIMUM  | NO RULE |         |
| C | BUPIVACAINE HCL (PF) 0.25 % IJ SOLN | 365  | 4379 | SINGLE DOSE MAXIMUM | NO RULE |         |
| C | BUPIVACAINE HCL (PF) 0.25 % IJ SOLN | 365  | 4379 | SINGLE DOSE MINIMUM | NO RULE |         |
| C | BUPIVACAINE HCL (PF) 0.25 % IJ SOLN | 365  | 4379 | TOTAL DAILY DOSE    | NO RULE |         |
| C | BUPIVACAINE HCL (PF) 0.25 % IJ SOLN | 4380 | 6570 | DAILY FREQ MAXIMUM  | NO RULE |         |
| C | BUPIVACAINE HCL (PF) 0.25 % IJ SOLN | 4380 | 6570 | DAILY FREQ MINIMUM  | NO RULE |         |
| C | BUPIVACAINE HCL (PF) 0.25 % IJ SOLN | 4380 | 6570 | SINGLE DOSE MAXIMUM | NO RULE |         |
| C | BUPIVACAINE HCL (PF) 0.25 % IJ SOLN | 4380 | 6570 | SINGLE DOSE MINIMUM | NO RULE |         |
| C | BUPIVACAINE HCL (PF) 0.25 % IJ SOLN | 4380 | 6570 | TOTAL DAILY DOSE    | NO RULE |         |
| C | CEFAZOLIN 100 MG/ML SW IV           | 0    | 7    | DAILY FREQ MAXIMUM  | 2       | DOSE(S) |
| C | CEFAZOLIN 100 MG/ML SW IV           | 0    | 7    | DAILY FREQ MINIMUM  | 2       | DOSE(S) |
| C | CEFAZOLIN 100 MG/ML SW IV           | 0    | 7    | SINGLE DOSE MAXIMUM | 20      | MG/KG   |
| C | CEFAZOLIN 100 MG/ML SW IV           | 0    | 7    | SINGLE DOSE MINIMUM | 20      | MG/KG   |
| C | CEFAZOLIN 100 MG/ML SW IV           | 0    | 7    | TOTAL DAILY DOSE    | 40      | MG/KG   |
| C | CEFAZOLIN 100 MG/ML SW IV           | 8    | 29   | DAILY FREQ MAXIMUM  | 3       | DOSE(S) |
| C | CEFAZOLIN 100 MG/ML SW IV           | 8    | 29   | DAILY FREQ MINIMUM  | 2       | DOSE(S) |
| C | CEFAZOLIN 100 MG/ML SW IV           | 8    | 29   | SINGLE DOSE MAXIMUM | 20      | MG/KG   |
| C | CEFAZOLIN 100 MG/ML SW IV           | 8    | 29   | SINGLE DOSE MINIMUM | 20      | MG/KG   |
| C | CEFAZOLIN 100 MG/ML SW IV           | 8    | 29   | TOTAL DAILY DOSE    | 60      | MG/KG   |
| C | CEFAZOLIN 100 MG/ML SW IV           | 30   | 4379 | DAILY FREQ MAXIMUM  | 4       | DOSE(S) |
| C | CEFAZOLIN 100 MG/ML SW IV           | 30   | 4379 | DAILY FREQ MINIMUM  | 1       | DOSE(S) |
| C | CEFAZOLIN 100 MG/ML SW IV           | 30   | 4379 | SINGLE DOSE MAXIMUM | 33.33   | MG/KG   |
| C | CEFAZOLIN 100 MG/ML SW IV           | 30   | 4379 | SINGLE DOSE MINIMUM | 25      | MG/KG   |
| C | CEFAZOLIN 100 MG/ML SW IV           | 30   | 4379 | TOTAL DAILY DOSE    | 100     | MG/KG   |
| C | CEFAZOLIN 100 MG/ML SW IV           | 4380 | 6570 | DAILY FREQ MAXIMUM  | 4       | DOSE(S) |
| C | CEFAZOLIN 100 MG/ML SW IV           | 4380 | 6570 | DAILY FREQ MINIMUM  | 1       | DOSE(S) |
| C | CEFAZOLIN 100 MG/ML SW IV           | 4380 | 6570 | SINGLE DOSE MAXIMUM | 2000    | MG      |
| C | CEFAZOLIN 100 MG/ML SW IV           | 4380 | 6570 | SINGLE DOSE MINIMUM | 187.5   | MG      |
| C | CEFAZOLIN 100 MG/ML SW IV           | 4380 | 6570 | TOTAL DAILY DOSE    | 6       | GM      |
| A | CIPROFLOXACIN HCL 0.3 % OP SOLN     | 0    | 364  | DAILY FREQ MAXIMUM  | NO RULE |         |
| A | CIPROFLOXACIN HCL 0.3 % OP SOLN     | 0    | 364  | DAILY FREQ MINIMUM  | NO RULE |         |

|   |                                               |      |      |                     |         |         |
|---|-----------------------------------------------|------|------|---------------------|---------|---------|
| A | CIPROFLOXACIN HCL 0.3 % OP SOLN               | 0    | 364  | SINGLE DOSE MAXIMUM | NO RULE |         |
| A | CIPROFLOXACIN HCL 0.3 % OP SOLN               | 0    | 364  | SINGLE DOSE MINIMUM | NO RULE |         |
| A | CIPROFLOXACIN HCL 0.3 % OP SOLN               | 0    | 364  | TOTAL DAILY DOSE    | NO RULE |         |
| A | CIPROFLOXACIN HCL 0.3 % OP SOLN               | 365  | 729  | DAILY FREQ MAXIMUM  | 6       | DOSE(S) |
| A | CIPROFLOXACIN HCL 0.3 % OP SOLN               | 365  | 729  | DAILY FREQ MINIMUM  | 6       | DOSE(S) |
| A | CIPROFLOXACIN HCL 0.3 % OP SOLN               | 365  | 729  | SINGLE DOSE MAXIMUM | 2       | DROP(S) |
| A | CIPROFLOXACIN HCL 0.3 % OP SOLN               | 365  | 729  | SINGLE DOSE MINIMUM | 1       | DROP(S) |
| A | CIPROFLOXACIN HCL 0.3 % OP SOLN               | 365  | 729  | TOTAL DAILY DOSE    | 12      | DROP(S) |
| A | CIPROFLOXACIN HCL 0.3 % OP SOLN               | 730  | 4379 | DAILY FREQ MAXIMUM  | 6       | DOSE(S) |
| A | CIPROFLOXACIN HCL 0.3 % OP SOLN               | 730  | 4379 | DAILY FREQ MINIMUM  | 6       | DOSE(S) |
| A | CIPROFLOXACIN HCL 0.3 % OP SOLN               | 730  | 4379 | SINGLE DOSE MAXIMUM | 2       | DROP(S) |
| A | CIPROFLOXACIN HCL 0.3 % OP SOLN               | 730  | 4379 | SINGLE DOSE MINIMUM | 1       | DROP(S) |
| A | CIPROFLOXACIN HCL 0.3 % OP SOLN               | 730  | 4379 | TOTAL DAILY DOSE    | 12      | DROP(S) |
| A | CIPROFLOXACIN HCL 0.3 % OP SOLN               | 4380 | 6570 | DAILY FREQ MAXIMUM  | 6       | DOSE(S) |
| A | CIPROFLOXACIN HCL 0.3 % OP SOLN               | 4380 | 6570 | DAILY FREQ MINIMUM  | 6       | DOSE(S) |
| A | CIPROFLOXACIN HCL 0.3 % OP SOLN               | 4380 | 6570 | SINGLE DOSE MAXIMUM | 2       | DROP(S) |
| A | CIPROFLOXACIN HCL 0.3 % OP SOLN               | 4380 | 6570 | SINGLE DOSE MINIMUM | 1       | DROP(S) |
| A | CIPROFLOXACIN HCL 0.3 % OP SOLN               | 4380 | 6570 | TOTAL DAILY DOSE    | 12      | DROP(S) |
| C | CIPROFLOXACIN-DEXAMETHASONE 0.3-0.1 % OT SUSP | 0    | 179  | DAILY FREQ MAXIMUM  | NO RULE |         |
| C | CIPROFLOXACIN-DEXAMETHASONE 0.3-0.1 % OT SUSP | 0    | 179  | DAILY FREQ MINIMUM  | NO RULE |         |
| C | CIPROFLOXACIN-DEXAMETHASONE 0.3-0.1 % OT SUSP | 0    | 179  | SINGLE DOSE MAXIMUM | NO RULE |         |
| C | CIPROFLOXACIN-DEXAMETHASONE 0.3-0.1 % OT SUSP | 0    | 179  | SINGLE DOSE MINIMUM | NO RULE |         |
| C | CIPROFLOXACIN-DEXAMETHASONE 0.3-0.1 % OT SUSP | 0    | 179  | TOTAL DAILY DOSE    | NO RULE |         |
| C | CIPROFLOXACIN-DEXAMETHASONE 0.3-0.1 % OT SUSP | 180  | 364  | DAILY FREQ MAXIMUM  | 2       | DOSE(S) |
| C | CIPROFLOXACIN-DEXAMETHASONE 0.3-0.1 % OT SUSP | 180  | 364  | DAILY FREQ MINIMUM  | 2       | DOSE(S) |
| C | CIPROFLOXACIN-DEXAMETHASONE 0.3-0.1 % OT SUSP | 180  | 364  | SINGLE DOSE MAXIMUM | 4       | DROP(S) |
| C | CIPROFLOXACIN-DEXAMETHASONE 0.3-0.1 % OT SUSP | 180  | 364  | SINGLE DOSE MINIMUM | 4       | DROP(S) |
| C | CIPROFLOXACIN-DEXAMETHASONE 0.3-0.1 % OT SUSP | 180  | 364  | TOTAL DAILY DOSE    | 8       | DROP(S) |
| C | CIPROFLOXACIN-DEXAMETHASONE 0.3-0.1 % OT SUSP | 365  | 6570 | DAILY FREQ MAXIMUM  | 2       | DOSE(S) |
| C | CIPROFLOXACIN-DEXAMETHASONE 0.3-0.1 % OT SUSP | 365  | 6570 | DAILY FREQ MINIMUM  | 2       | DOSE(S) |
| C | CIPROFLOXACIN-DEXAMETHASONE 0.3-0.1 % OT SUSP | 365  | 6570 | SINGLE DOSE MAXIMUM | 4       | DROP(S) |
| C | CIPROFLOXACIN-DEXAMETHASONE 0.3-0.1 % OT SUSP | 365  | 6570 | SINGLE DOSE MINIMUM | 3       | DROP(S) |
| C | CIPROFLOXACIN-DEXAMETHASONE 0.3-0.1 % OT SUSP | 365  | 6570 | TOTAL DAILY DOSE    | 8       | DROP(S) |
| B | EPOETIN ALFA 2000 UNIT/ML IJ SOLN             | 0    | 29   | DAILY FREQ MAXIMUM  | NO RULE |         |

|     |                                     |      |      |                     |         |         |
|-----|-------------------------------------|------|------|---------------------|---------|---------|
| B   | EPOETIN ALFA 2000 UNIT/ML IJ SOLN   | 0    | 29   | DAILY FREQ MINIMUM  | NO RULE |         |
| B   | EPOETIN ALFA 2000 UNIT/ML IJ SOLN   | 0    | 29   | SINGLE DOSE MAXIMUM | NO RULE |         |
| B   | EPOETIN ALFA 2000 UNIT/ML IJ SOLN   | 0    | 29   | SINGLE DOSE MINIMUM | NO RULE |         |
| B   | EPOETIN ALFA 2000 UNIT/ML IJ SOLN   | 0    | 29   | TOTAL DAILY DOSE    | NO RULE |         |
| B   | EPOETIN ALFA 2000 UNIT/ML IJ SOLN   | 30   | 179  | DAILY FREQ MAXIMUM  | NO RULE |         |
| B   | EPOETIN ALFA 2000 UNIT/ML IJ SOLN   | 30   | 179  | DAILY FREQ MINIMUM  | NO RULE |         |
| B   | EPOETIN ALFA 2000 UNIT/ML IJ SOLN   | 30   | 179  | SINGLE DOSE MAXIMUM | NO RULE |         |
| B   | EPOETIN ALFA 2000 UNIT/ML IJ SOLN   | 30   | 179  | SINGLE DOSE MINIMUM | NO RULE |         |
| B   | EPOETIN ALFA 2000 UNIT/ML IJ SOLN   | 30   | 179  | TOTAL DAILY DOSE    | NO RULE |         |
| B   | EPOETIN ALFA 2000 UNIT/ML IJ SOLN   | 180  | 239  | DAILY FREQ MAXIMUM  | NO RULE |         |
| B   | EPOETIN ALFA 2000 UNIT/ML IJ SOLN   | 180  | 239  | DAILY FREQ MINIMUM  | NO RULE |         |
| B   | EPOETIN ALFA 2000 UNIT/ML IJ SOLN   | 180  | 239  | SINGLE DOSE MAXIMUM | NO RULE |         |
| B   | EPOETIN ALFA 2000 UNIT/ML IJ SOLN   | 180  | 239  | SINGLE DOSE MINIMUM | NO RULE |         |
| B   | EPOETIN ALFA 2000 UNIT/ML IJ SOLN   | 180  | 239  | TOTAL DAILY DOSE    | NO RULE |         |
| B   | EPOETIN ALFA 2000 UNIT/ML IJ SOLN   | 240  | 1824 | DAILY FREQ MAXIMUM  | NO RULE |         |
| B   | EPOETIN ALFA 2000 UNIT/ML IJ SOLN   | 240  | 1824 | DAILY FREQ MINIMUM  | NO RULE |         |
| B   | EPOETIN ALFA 2000 UNIT/ML IJ SOLN   | 240  | 1824 | SINGLE DOSE MAXIMUM | NO RULE |         |
| B   | EPOETIN ALFA 2000 UNIT/ML IJ SOLN   | 240  | 1824 | SINGLE DOSE MINIMUM | NO RULE |         |
| B   | EPOETIN ALFA 2000 UNIT/ML IJ SOLN   | 240  | 1824 | TOTAL DAILY DOSE    | NO RULE |         |
| B   | EPOETIN ALFA 2000 UNIT/ML IJ SOLN   | 1825 | 5839 | DAILY FREQ MAXIMUM  | NO RULE |         |
| B   | EPOETIN ALFA 2000 UNIT/ML IJ SOLN   | 1825 | 5839 | DAILY FREQ MINIMUM  | NO RULE |         |
| B   | EPOETIN ALFA 2000 UNIT/ML IJ SOLN   | 1825 | 5839 | SINGLE DOSE MAXIMUM | NO RULE |         |
| B   | EPOETIN ALFA 2000 UNIT/ML IJ SOLN   | 1825 | 5839 | SINGLE DOSE MINIMUM | NO RULE |         |
| B   | EPOETIN ALFA 2000 UNIT/ML IJ SOLN   | 1825 | 5839 | TOTAL DAILY DOSE    | NO RULE |         |
| B   | EPOETIN ALFA 2000 UNIT/ML IJ SOLN   | 5840 | 6570 | DAILY FREQ MAXIMUM  | NO RULE |         |
| B   | EPOETIN ALFA 2000 UNIT/ML IJ SOLN   | 5840 | 6570 | DAILY FREQ MINIMUM  | NO RULE |         |
| B   | EPOETIN ALFA 2000 UNIT/ML IJ SOLN   | 5840 | 6570 | SINGLE DOSE MAXIMUM | NO RULE |         |
| B   | EPOETIN ALFA 2000 UNIT/ML IJ SOLN   | 5840 | 6570 | SINGLE DOSE MINIMUM | NO RULE |         |
| B   | EPOETIN ALFA 2000 UNIT/ML IJ SOLN   | 5840 | 6570 | TOTAL DAILY DOSE    | NO RULE |         |
| A,C | FENTANYL CITRATE 0.05 MG/ML IJ SOLN | 0    | 29   | DAILY FREQ MAXIMUM  | 12      | DOSE(S) |
| A,C | FENTANYL CITRATE 0.05 MG/ML IJ SOLN | 0    | 29   | DAILY FREQ MINIMUM  | 1       | DOSE(S) |
| A,C | FENTANYL CITRATE 0.05 MG/ML IJ SOLN | 0    | 29   | SINGLE DOSE MAXIMUM | 4       | MCG/KG  |
| A,C | FENTANYL CITRATE 0.05 MG/ML IJ SOLN | 0    | 29   | SINGLE DOSE MINIMUM | 1       | MCG/KG  |
| A,C | FENTANYL CITRATE 0.05 MG/ML IJ SOLN | 0    | 29   | TOTAL DAILY DOSE    | 48      | MCG/KG  |



|     |                                     |      |      |                     |         |         |
|-----|-------------------------------------|------|------|---------------------|---------|---------|
| A,C | FENTANYL CITRATE 0.05 MG/ML IJ SOLN | 30   | 179  | DAILY FREQ MAXIMUM  | 48      | DOSE(S) |
| A,C | FENTANYL CITRATE 0.05 MG/ML IJ SOLN | 30   | 179  | DAILY FREQ MINIMUM  | 1       | DOSE(S) |
| A,C | FENTANYL CITRATE 0.05 MG/ML IJ SOLN | 30   | 179  | SINGLE DOSE MAXIMUM | 2       | MCG/KG  |
| A,C | FENTANYL CITRATE 0.05 MG/ML IJ SOLN | 30   | 179  | SINGLE DOSE MINIMUM | 1       | MCG/KG  |
| A,C | FENTANYL CITRATE 0.05 MG/ML IJ SOLN | 30   | 179  | TOTAL DAILY DOSE    | 96      | MCG/KG  |
| A,C | FENTANYL CITRATE 0.05 MG/ML IJ SOLN | 180  | 364  | DAILY FREQ MAXIMUM  | 48      | DOSE(S) |
| A,C | FENTANYL CITRATE 0.05 MG/ML IJ SOLN | 180  | 364  | DAILY FREQ MINIMUM  | 1       | DOSE(S) |
| A,C | FENTANYL CITRATE 0.05 MG/ML IJ SOLN | 180  | 364  | SINGLE DOSE MAXIMUM | 2       | MCG/KG  |
| A,C | FENTANYL CITRATE 0.05 MG/ML IJ SOLN | 180  | 364  | SINGLE DOSE MINIMUM | 1       | MCG/KG  |
| A,C | FENTANYL CITRATE 0.05 MG/ML IJ SOLN | 180  | 364  | TOTAL DAILY DOSE    | 96      | MCG/KG  |
| A,C | FENTANYL CITRATE 0.05 MG/ML IJ SOLN | 365  | 544  | DAILY FREQ MAXIMUM  | 48      | DOSE(S) |
| A,C | FENTANYL CITRATE 0.05 MG/ML IJ SOLN | 365  | 544  | DAILY FREQ MINIMUM  | 1       | DOSE(S) |
| A,C | FENTANYL CITRATE 0.05 MG/ML IJ SOLN | 365  | 544  | SINGLE DOSE MAXIMUM | 2       | MCG/KG  |
| A,C | FENTANYL CITRATE 0.05 MG/ML IJ SOLN | 365  | 544  | SINGLE DOSE MINIMUM | 1       | MCG/KG  |
| A,C | FENTANYL CITRATE 0.05 MG/ML IJ SOLN | 365  | 544  | TOTAL DAILY DOSE    | 96      | MCG/KG  |
| A,C | FENTANYL CITRATE 0.05 MG/ML IJ SOLN | 545  | 1094 | DAILY FREQ MAXIMUM  | 48      | DOSE(S) |
| A,C | FENTANYL CITRATE 0.05 MG/ML IJ SOLN | 545  | 1094 | DAILY FREQ MINIMUM  | 1       | DOSE(S) |
| A,C | FENTANYL CITRATE 0.05 MG/ML IJ SOLN | 545  | 1094 | SINGLE DOSE MAXIMUM | 2       | MCG/KG  |
| A,C | FENTANYL CITRATE 0.05 MG/ML IJ SOLN | 545  | 1094 | SINGLE DOSE MINIMUM | 1       | MCG/KG  |
| A,C | FENTANYL CITRATE 0.05 MG/ML IJ SOLN | 545  | 1094 | TOTAL DAILY DOSE    | 96      | MCG/KG  |
| A,C | FENTANYL CITRATE 0.05 MG/ML IJ SOLN | 1095 | 4379 | DAILY FREQ MAXIMUM  | 48      | DOSE(S) |
| A,C | FENTANYL CITRATE 0.05 MG/ML IJ SOLN | 1095 | 4379 | DAILY FREQ MINIMUM  | 1       | DOSE(S) |
| A,C | FENTANYL CITRATE 0.05 MG/ML IJ SOLN | 1095 | 4379 | SINGLE DOSE MAXIMUM | 2       | MCG/KG  |
| A,C | FENTANYL CITRATE 0.05 MG/ML IJ SOLN | 1095 | 4379 | SINGLE DOSE MINIMUM | 1       | MCG/KG  |
| A,C | FENTANYL CITRATE 0.05 MG/ML IJ SOLN | 1095 | 4379 | TOTAL DAILY DOSE    | 96      | MCG/KG  |
| A,C | FENTANYL CITRATE 0.05 MG/ML IJ SOLN | 4380 | 6570 | DAILY FREQ MAXIMUM  | 48      | DOSE(S) |
| A,C | FENTANYL CITRATE 0.05 MG/ML IJ SOLN | 4380 | 6570 | DAILY FREQ MINIMUM  | 1       | DOSE(S) |
| A,C | FENTANYL CITRATE 0.05 MG/ML IJ SOLN | 4380 | 6570 | SINGLE DOSE MAXIMUM | 100     | MCG     |
| A,C | FENTANYL CITRATE 0.05 MG/ML IJ SOLN | 4380 | 6570 | SINGLE DOSE MINIMUM | 25      | MCG     |
| A,C | FENTANYL CITRATE 0.05 MG/ML IJ SOLN | 4380 | 6570 | TOTAL DAILY DOSE    | 4800    | MCG     |
| B   | FLUOXETINE HCL 20 MG PO CAPS        | 0    | 2554 | DAILY FREQ MAXIMUM  | NO RULE |         |
| B   | FLUOXETINE HCL 20 MG PO CAPS        | 0    | 2554 | DAILY FREQ MINIMUM  | NO RULE |         |
| B   | FLUOXETINE HCL 20 MG PO CAPS        | 0    | 2554 | SINGLE DOSE MAXIMUM | NO RULE |         |
| B   | FLUOXETINE HCL 20 MG PO CAPS        | 0    | 2554 | SINGLE DOSE MINIMUM | NO RULE |         |

|     |                              |      |      |                     |         |         |
|-----|------------------------------|------|------|---------------------|---------|---------|
| B   | FLUOXETINE HCL 20 MG PO CAPS | 0    | 2554 | TOTAL DAILY DOSE    | NO RULE |         |
| B   | FLUOXETINE HCL 20 MG PO CAPS | 2555 | 2919 | DAILY FREQ MAXIMUM  | 1       | DOSE(S) |
| B   | FLUOXETINE HCL 20 MG PO CAPS | 2555 | 2919 | DAILY FREQ MINIMUM  | 1       | DOSE(S) |
| B   | FLUOXETINE HCL 20 MG PO CAPS | 2555 | 2919 | SINGLE DOSE MAXIMUM | 60      | MG      |
| B   | FLUOXETINE HCL 20 MG PO CAPS | 2555 | 2919 | SINGLE DOSE MINIMUM | 10      | MG      |
| B   | FLUOXETINE HCL 20 MG PO CAPS | 2555 | 2919 | TOTAL DAILY DOSE    | 60      | MG      |
| B   | FLUOXETINE HCL 20 MG PO CAPS | 2920 | 6570 | DAILY FREQ MAXIMUM  | 1       | DOSE(S) |
| B   | FLUOXETINE HCL 20 MG PO CAPS | 2920 | 6570 | DAILY FREQ MINIMUM  | 1       | DOSE(S) |
| B   | FLUOXETINE HCL 20 MG PO CAPS | 2920 | 6570 | SINGLE DOSE MAXIMUM | 60      | MG      |
| B   | FLUOXETINE HCL 20 MG PO CAPS | 2920 | 6570 | SINGLE DOSE MINIMUM | 10      | MG      |
| B   | FLUOXETINE HCL 20 MG PO CAPS | 2920 | 6570 | TOTAL DAILY DOSE    | 60      | MG      |
| A,C | IBUPROFEN 100 MG/5ML PO SUSP | 0    | 179  | DAILY FREQ MAXIMUM  | NO RULE |         |
| A,C | IBUPROFEN 100 MG/5ML PO SUSP | 0    | 179  | DAILY FREQ MINIMUM  | NO RULE |         |
| A,C | IBUPROFEN 100 MG/5ML PO SUSP | 0    | 179  | SINGLE DOSE MAXIMUM | NO RULE |         |
| A,C | IBUPROFEN 100 MG/5ML PO SUSP | 0    | 179  | SINGLE DOSE MINIMUM | NO RULE |         |
| A,C | IBUPROFEN 100 MG/5ML PO SUSP | 0    | 179  | TOTAL DAILY DOSE    | NO RULE |         |
| A,C | IBUPROFEN 100 MG/5ML PO SUSP | 180  | 364  | DAILY FREQ MAXIMUM  | 4       | DOSE(S) |
| A,C | IBUPROFEN 100 MG/5ML PO SUSP | 180  | 364  | DAILY FREQ MINIMUM  | 1       | DOSE(S) |
| A,C | IBUPROFEN 100 MG/5ML PO SUSP | 180  | 364  | SINGLE DOSE MAXIMUM | 16.67   | MG/KG   |
| A,C | IBUPROFEN 100 MG/5ML PO SUSP | 180  | 364  | SINGLE DOSE MINIMUM | 4       | MG/KG   |
| A,C | IBUPROFEN 100 MG/5ML PO SUSP | 180  | 364  | TOTAL DAILY DOSE    | 50      | MG/KG   |
| A,C | IBUPROFEN 100 MG/5ML PO SUSP | 365  | 1824 | DAILY FREQ MAXIMUM  | 4       | DOSE(S) |
| A,C | IBUPROFEN 100 MG/5ML PO SUSP | 365  | 1824 | DAILY FREQ MINIMUM  | 1       | DOSE(S) |
| A,C | IBUPROFEN 100 MG/5ML PO SUSP | 365  | 1824 | SINGLE DOSE MAXIMUM | 16.67   | MG/KG   |
| A,C | IBUPROFEN 100 MG/5ML PO SUSP | 365  | 1824 | SINGLE DOSE MINIMUM | 4       | MG/KG   |
| A,C | IBUPROFEN 100 MG/5ML PO SUSP | 365  | 1824 | TOTAL DAILY DOSE    | 50      | MG/KG   |
| A,C | IBUPROFEN 100 MG/5ML PO SUSP | 1825 | 4379 | DAILY FREQ MAXIMUM  | 4       | DOSE(S) |
| A,C | IBUPROFEN 100 MG/5ML PO SUSP | 1825 | 4379 | DAILY FREQ MINIMUM  | 1       | DOSE(S) |
| A,C | IBUPROFEN 100 MG/5ML PO SUSP | 1825 | 4379 | SINGLE DOSE MAXIMUM | 16.67   | MG/KG   |
| A,C | IBUPROFEN 100 MG/5ML PO SUSP | 1825 | 4379 | SINGLE DOSE MINIMUM | 4       | MG/KG   |
| A,C | IBUPROFEN 100 MG/5ML PO SUSP | 1825 | 4379 | TOTAL DAILY DOSE    | 50      | MG/KG   |
| A,C | IBUPROFEN 100 MG/5ML PO SUSP | 4380 | 6570 | DAILY FREQ MAXIMUM  | 6       | DOSE(S) |
| A,C | IBUPROFEN 100 MG/5ML PO SUSP | 4380 | 6570 | DAILY FREQ MINIMUM  | 1       | DOSE(S) |
| A,C | IBUPROFEN 100 MG/5ML PO SUSP | 4380 | 6570 | SINGLE DOSE MAXIMUM | 800     | MG      |

|     |                              |      |      |                     |         |         |
|-----|------------------------------|------|------|---------------------|---------|---------|
| A,C | IBUPROFEN 100 MG/5ML PO SUSP | 4380 | 6570 | SINGLE DOSE MINIMUM | 200     | MG      |
| A,C | IBUPROFEN 100 MG/5ML PO SUSP | 4380 | 6570 | TOTAL DAILY DOSE    | 3200    | MG      |
| A,C | IBUPROFEN 200 MG PO TABS     | 0    | 179  | DAILY FREQ MAXIMUM  | NO RULE |         |
| A,C | IBUPROFEN 200 MG PO TABS     | 0    | 179  | DAILY FREQ MINIMUM  | NO RULE |         |
| A,C | IBUPROFEN 200 MG PO TABS     | 0    | 179  | SINGLE DOSE MAXIMUM | NO RULE |         |
| A,C | IBUPROFEN 200 MG PO TABS     | 0    | 179  | SINGLE DOSE MINIMUM | NO RULE |         |
| A,C | IBUPROFEN 200 MG PO TABS     | 0    | 179  | TOTAL DAILY DOSE    | NO RULE |         |
| A,C | IBUPROFEN 200 MG PO TABS     | 180  | 364  | DAILY FREQ MAXIMUM  | 4       | DOSE(S) |
| A,C | IBUPROFEN 200 MG PO TABS     | 180  | 364  | DAILY FREQ MINIMUM  | 1       | DOSE(S) |
| A,C | IBUPROFEN 200 MG PO TABS     | 180  | 364  | SINGLE DOSE MAXIMUM | 16.67   | MG/KG   |
| A,C | IBUPROFEN 200 MG PO TABS     | 180  | 364  | SINGLE DOSE MINIMUM | 4       | MG/KG   |
| A,C | IBUPROFEN 200 MG PO TABS     | 180  | 364  | TOTAL DAILY DOSE    | 50      | MG/KG   |
| A,C | IBUPROFEN 200 MG PO TABS     | 365  | 1824 | DAILY FREQ MAXIMUM  | 4       | DOSE(S) |
| A,C | IBUPROFEN 200 MG PO TABS     | 365  | 1824 | DAILY FREQ MINIMUM  | 1       | DOSE(S) |
| A,C | IBUPROFEN 200 MG PO TABS     | 365  | 1824 | SINGLE DOSE MAXIMUM | 16.67   | MG/KG   |
| A,C | IBUPROFEN 200 MG PO TABS     | 365  | 1824 | SINGLE DOSE MINIMUM | 4       | MG/KG   |
| A,C | IBUPROFEN 200 MG PO TABS     | 365  | 1824 | TOTAL DAILY DOSE    | 50      | MG/KG   |
| A,C | IBUPROFEN 200 MG PO TABS     | 1825 | 4379 | DAILY FREQ MAXIMUM  | 4       | DOSE(S) |
| A,C | IBUPROFEN 200 MG PO TABS     | 1825 | 4379 | DAILY FREQ MINIMUM  | 1       | DOSE(S) |
| A,C | IBUPROFEN 200 MG PO TABS     | 1825 | 4379 | SINGLE DOSE MAXIMUM | 16.67   | MG/KG   |
| A,C | IBUPROFEN 200 MG PO TABS     | 1825 | 4379 | SINGLE DOSE MINIMUM | 4       | MG/KG   |
| A,C | IBUPROFEN 200 MG PO TABS     | 1825 | 4379 | TOTAL DAILY DOSE    | 50      | MG/KG   |
| A,C | IBUPROFEN 200 MG PO TABS     | 4380 | 6570 | DAILY FREQ MAXIMUM  | 6       | DOSE(S) |
| A,C | IBUPROFEN 200 MG PO TABS     | 4380 | 6570 | DAILY FREQ MINIMUM  | 1       | DOSE(S) |
| A,C | IBUPROFEN 200 MG PO TABS     | 4380 | 6570 | SINGLE DOSE MAXIMUM | 800     | MG      |
| A,C | IBUPROFEN 200 MG PO TABS     | 4380 | 6570 | SINGLE DOSE MINIMUM | 200     | MG      |
| A,C | IBUPROFEN 200 MG PO TABS     | 4380 | 6570 | TOTAL DAILY DOSE    | 3200    | MG      |
| B   | INFLIXIMAB FOR IV INJ 100 MG | 0    | 2189 | DAILY FREQ MAXIMUM  | 0.0179  | DOSE(S) |
| B   | INFLIXIMAB FOR IV INJ 100 MG | 0    | 2189 | DAILY FREQ MINIMUM  | 0.179   | DOSE(S) |
| B   | INFLIXIMAB FOR IV INJ 100 MG | 0    | 2189 | SINGLE DOSE MAXIMUM | 5       | MG/KG   |
| B   | INFLIXIMAB FOR IV INJ 100 MG | 0    | 2189 | SINGLE DOSE MINIMUM | 0.089   | MG/KG   |
| B   | INFLIXIMAB FOR IV INJ 100 MG | 0    | 2189 | TOTAL DAILY DOSE    | 0.089   | MG/KG   |
| B   | INFLIXIMAB FOR IV INJ 100 MG | 2190 | 6570 | DAILY FREQ MAXIMUM  | 0.0358  | DOSE(S) |
| B   | INFLIXIMAB FOR IV INJ 100 MG | 2190 | 6570 | DAILY FREQ MINIMUM  | 0.0179  | DOSE(S) |

|   |                                    |      |      |                     |         |         |
|---|------------------------------------|------|------|---------------------|---------|---------|
| B | INFLIXIMAB FOR IV INJ 100 MG       | 2190 | 6570 | SINGLE DOSE MAXIMUM | 10      | MG/KG   |
| B | INFLIXIMAB FOR IV INJ 100 MG       | 2190 | 6570 | SINGLE DOSE MINIMUM | 0.053   | MG/KG   |
| B | INFLIXIMAB FOR IV INJ 100 MG       | 2190 | 6570 | TOTAL DAILY DOSE    | 5       | MG/KG   |
| B | IPRATROPIUM BROMIDE 0.02 % IN SOLN | 0    | 29   | DAILY FREQ MAXIMUM  | NO RULE |         |
| B | IPRATROPIUM BROMIDE 0.02 % IN SOLN | 0    | 29   | DAILY FREQ MINIMUM  | NO RULE |         |
| B | IPRATROPIUM BROMIDE 0.02 % IN SOLN | 0    | 29   | SINGLE DOSE MAXIMUM | NO RULE |         |
| B | IPRATROPIUM BROMIDE 0.02 % IN SOLN | 0    | 29   | SINGLE DOSE MINIMUM | NO RULE |         |
| B | IPRATROPIUM BROMIDE 0.02 % IN SOLN | 0    | 29   | TOTAL DAILY DOSE    | NO RULE |         |
| B | IPRATROPIUM BROMIDE 0.02 % IN SOLN | 30   | 89   | DAILY FREQ MAXIMUM  | NO RULE |         |
| B | IPRATROPIUM BROMIDE 0.02 % IN SOLN | 30   | 89   | DAILY FREQ MINIMUM  | NO RULE |         |
| B | IPRATROPIUM BROMIDE 0.02 % IN SOLN | 30   | 89   | SINGLE DOSE MAXIMUM | NO RULE |         |
| B | IPRATROPIUM BROMIDE 0.02 % IN SOLN | 30   | 89   | SINGLE DOSE MINIMUM | NO RULE |         |
| B | IPRATROPIUM BROMIDE 0.02 % IN SOLN | 30   | 89   | TOTAL DAILY DOSE    | NO RULE |         |
| B | IPRATROPIUM BROMIDE 0.02 % IN SOLN | 90   | 364  | DAILY FREQ MAXIMUM  | 6       | DOSE(S) |
| B | IPRATROPIUM BROMIDE 0.02 % IN SOLN | 90   | 364  | DAILY FREQ MINIMUM  | 1       | DOSE(S) |
| B | IPRATROPIUM BROMIDE 0.02 % IN SOLN | 90   | 364  | SINGLE DOSE MAXIMUM | 0.5     | MG      |
| B | IPRATROPIUM BROMIDE 0.02 % IN SOLN | 90   | 364  | SINGLE DOSE MINIMUM | 0.25    | MG      |
| B | IPRATROPIUM BROMIDE 0.02 % IN SOLN | 90   | 364  | TOTAL DAILY DOSE    | 1.5     | MG      |
| B | IPRATROPIUM BROMIDE 0.02 % IN SOLN | 365  | 1824 | DAILY FREQ MAXIMUM  | 6       | DOSE(S) |
| B | IPRATROPIUM BROMIDE 0.02 % IN SOLN | 365  | 1824 | DAILY FREQ MINIMUM  | 1       | DOSE(S) |
| B | IPRATROPIUM BROMIDE 0.02 % IN SOLN | 365  | 1824 | SINGLE DOSE MAXIMUM | 0.5     | MG      |
| B | IPRATROPIUM BROMIDE 0.02 % IN SOLN | 365  | 1824 | SINGLE DOSE MINIMUM | 0.25    | MG      |
| B | IPRATROPIUM BROMIDE 0.02 % IN SOLN | 365  | 1824 | TOTAL DAILY DOSE    | 1.5     | MG      |
| B | IPRATROPIUM BROMIDE 0.02 % IN SOLN | 1825 | 4379 | DAILY FREQ MAXIMUM  | 6       | DOSE(S) |
| B | IPRATROPIUM BROMIDE 0.02 % IN SOLN | 1825 | 4379 | DAILY FREQ MINIMUM  | 1       | DOSE(S) |
| B | IPRATROPIUM BROMIDE 0.02 % IN SOLN | 1825 | 4379 | SINGLE DOSE MAXIMUM | 0.5     | MG      |
| B | IPRATROPIUM BROMIDE 0.02 % IN SOLN | 1825 | 4379 | SINGLE DOSE MINIMUM | 0.25    | MG      |
| B | IPRATROPIUM BROMIDE 0.02 % IN SOLN | 1825 | 4379 | TOTAL DAILY DOSE    | 1.5     | MG      |
| B | IPRATROPIUM BROMIDE 0.02 % IN SOLN | 4380 | 6570 | DAILY FREQ MAXIMUM  | 12      | DOSE(S) |
| B | IPRATROPIUM BROMIDE 0.02 % IN SOLN | 4380 | 6570 | DAILY FREQ MINIMUM  | 1       | DOSE(S) |
| B | IPRATROPIUM BROMIDE 0.02 % IN SOLN | 4380 | 6570 | SINGLE DOSE MAXIMUM | 0.5     | MG      |
| B | IPRATROPIUM BROMIDE 0.02 % IN SOLN | 4380 | 6570 | SINGLE DOSE MINIMUM | 0.25    | MG      |
| B | IPRATROPIUM BROMIDE 0.02 % IN SOLN | 4380 | 6570 | TOTAL DAILY DOSE    | 6       | MG      |
| A | LIDOCAINE CREAM 4%                 | 0    | 29   | DAILY FREQ MAXIMUM  | NO RULE |         |

|   |                              |      |      |                     |         |               |
|---|------------------------------|------|------|---------------------|---------|---------------|
| A | LIDOCAINE CREAM 4%           | 0    | 29   | DAILY FREQ MINIMUM  | NO RULE |               |
| A | LIDOCAINE CREAM 4%           | 0    | 29   | SINGLE DOSE MAXIMUM | NO RULE |               |
| A | LIDOCAINE CREAM 4%           | 0    | 29   | SINGLE DOSE MINIMUM | NO RULE |               |
| A | LIDOCAINE CREAM 4%           | 0    | 29   | TOTAL DAILY DOSE    | NO RULE |               |
| A | LIDOCAINE CREAM 4%           | 30   | 729  | DAILY FREQ MAXIMUM  | NO RULE |               |
| A | LIDOCAINE CREAM 4%           | 30   | 729  | DAILY FREQ MINIMUM  | NO RULE |               |
| A | LIDOCAINE CREAM 4%           | 30   | 729  | SINGLE DOSE MAXIMUM | NO RULE |               |
| A | LIDOCAINE CREAM 4%           | 30   | 729  | SINGLE DOSE MINIMUM | NO RULE |               |
| A | LIDOCAINE CREAM 4%           | 30   | 729  | TOTAL DAILY DOSE    | NO RULE |               |
| A | LIDOCAINE CREAM 4%           | 730  | 4379 | DAILY FREQ MAXIMUM  | 4       | DOSE(S)       |
| A | LIDOCAINE CREAM 4%           | 730  | 4379 | DAILY FREQ MINIMUM  | 1       | DOSE(S)       |
| A | LIDOCAINE CREAM 4%           | 730  | 4379 | SINGLE DOSE MAXIMUM | 1       | APPLICATOR(S) |
| A | LIDOCAINE CREAM 4%           | 730  | 4379 | SINGLE DOSE MINIMUM | 1       | APPLICATOR(S) |
| A | LIDOCAINE CREAM 4%           | 730  | 4379 | TOTAL DAILY DOSE    | 4       | APPLICATOR(S) |
| A | LIDOCAINE CREAM 4%           | 4380 | 6570 | DAILY FREQ MAXIMUM  | 4       | DOSE(S)       |
| A | LIDOCAINE CREAM 4%           | 4380 | 6570 | DAILY FREQ MINIMUM  | 1       | DOSE(S)       |
| A | LIDOCAINE CREAM 4%           | 4380 | 6570 | SINGLE DOSE MAXIMUM | 1       | APPLICATOR(S) |
| A | LIDOCAINE CREAM 4%           | 4380 | 6570 | SINGLE DOSE MINIMUM | 1       | APPLICATOR(S) |
| A | LIDOCAINE CREAM 4%           | 4380 | 6570 | TOTAL DAILY DOSE    | 4       | APPLICATOR(S) |
| B | MEROPENEM IV FOR SOLN 500 MG | 0    | 7    | DAILY FREQ MAXIMUM  | 3       | DOSE(S)       |
| B | MEROPENEM IV FOR SOLN 500 MG | 0    | 7    | DAILY FREQ MINIMUM  | 2       | DOSE(S)       |
| B | MEROPENEM IV FOR SOLN 500 MG | 0    | 7    | SINGLE DOSE MAXIMUM | 40      | MG/KG         |
| B | MEROPENEM IV FOR SOLN 500 MG | 0    | 7    | SINGLE DOSE MINIMUM | 20      | MG/KG         |
| B | MEROPENEM IV FOR SOLN 500 MG | 0    | 7    | TOTAL DAILY DOSE    | 120     | MG/KG         |
| B | MEROPENEM IV FOR SOLN 500 MG | 8    | 29   | DAILY FREQ MAXIMUM  | 3       | DOSE(S)       |
| B | MEROPENEM IV FOR SOLN 500 MG | 8    | 29   | DAILY FREQ MINIMUM  | 2       | DOSE(S)       |
| B | MEROPENEM IV FOR SOLN 500 MG | 8    | 29   | SINGLE DOSE MAXIMUM | 40      | MG/KG         |
| B | MEROPENEM IV FOR SOLN 500 MG | 8    | 29   | SINGLE DOSE MINIMUM | 20      | MG/KG         |
| B | MEROPENEM IV FOR SOLN 500 MG | 8    | 29   | TOTAL DAILY DOSE    | 120     | MG/KG         |
| B | MEROPENEM IV FOR SOLN 500 MG | 30   | 4379 | DAILY FREQ MAXIMUM  | 3       | DOSE(S)       |
| B | MEROPENEM IV FOR SOLN 500 MG | 30   | 4379 | DAILY FREQ MINIMUM  | 3       | DOSE(S)       |
| B | MEROPENEM IV FOR SOLN 500 MG | 30   | 4379 | SINGLE DOSE MAXIMUM | 40      | MG/KG         |
| B | MEROPENEM IV FOR SOLN 500 MG | 30   | 4379 | SINGLE DOSE MINIMUM | 10      | MG/KG         |
| B | MEROPENEM IV FOR SOLN 500 MG | 30   | 4379 | TOTAL DAILY DOSE    | 6000    | MG            |

|   |                                       |      |      |                     |       |         |
|---|---------------------------------------|------|------|---------------------|-------|---------|
| B | MEROPENEM IV FOR SOLN 500 MG          | 4380 | 6570 | DAILY FREQ MAXIMUM  | 3     | DOSE(S) |
| B | MEROPENEM IV FOR SOLN 500 MG          | 4380 | 6570 | DAILY FREQ MINIMUM  | 3     | DOSE(S) |
| B | MEROPENEM IV FOR SOLN 500 MG          | 4380 | 6570 | SINGLE DOSE MAXIMUM | 2000  | MG      |
| B | MEROPENEM IV FOR SOLN 500 MG          | 4380 | 6570 | SINGLE DOSE MINIMUM | 500   | MG      |
| B | MEROPENEM IV FOR SOLN 500 MG          | 4380 | 6570 | TOTAL DAILY DOSE    | 6000  | MG      |
| B | METRONIDAZOLE TAB 500 MG              | 0    | 7    | DAILY FREQ MAXIMUM  | 2     | DOSE(S) |
| B | METRONIDAZOLE TAB 500 MG              | 0    | 7    | DAILY FREQ MINIMUM  | 0.5   | DOSE(S) |
| B | METRONIDAZOLE TAB 500 MG              | 0    | 7    | SINGLE DOSE MAXIMUM | 7.5   | MG/KG   |
| B | METRONIDAZOLE TAB 500 MG              | 0    | 7    | SINGLE DOSE MINIMUM | 7.5   | MG/KG   |
| B | METRONIDAZOLE TAB 500 MG              | 0    | 7    | TOTAL DAILY DOSE    | 15    | MG/KG   |
| B | METRONIDAZOLE TAB 500 MG              | 8    | 29   | DAILY FREQ MAXIMUM  | 2     | DOSE(S) |
| B | METRONIDAZOLE TAB 500 MG              | 8    | 29   | DAILY FREQ MINIMUM  | 0.5   | DOSE(S) |
| B | METRONIDAZOLE TAB 500 MG              | 8    | 29   | SINGLE DOSE MAXIMUM | 15    | MG/KG   |
| B | METRONIDAZOLE TAB 500 MG              | 8    | 29   | SINGLE DOSE MINIMUM | 7.5   | MG/KG   |
| B | METRONIDAZOLE TAB 500 MG              | 8    | 29   | TOTAL DAILY DOSE    | 30    | MG/KG   |
| B | METRONIDAZOLE TAB 500 MG              | 30   | 364  | DAILY FREQ MAXIMUM  | 4     | DOSE(S) |
| B | METRONIDAZOLE TAB 500 MG              | 30   | 364  | DAILY FREQ MINIMUM  | 3     | DOSE(S) |
| B | METRONIDAZOLE TAB 500 MG              | 30   | 364  | SINGLE DOSE MAXIMUM | 16.67 | MG/KG   |
| B | METRONIDAZOLE TAB 500 MG              | 30   | 364  | SINGLE DOSE MINIMUM | 1.25  | MG/KG   |
| B | METRONIDAZOLE TAB 500 MG              | 30   | 364  | TOTAL DAILY DOSE    | 50    | MG/KG   |
| B | METRONIDAZOLE TAB 500 MG              | 365  | 4379 | DAILY FREQ MAXIMUM  | 4     | DOSE(S) |
| B | METRONIDAZOLE TAB 500 MG              | 365  | 4379 | DAILY FREQ MINIMUM  | 3     | DOSE(S) |
| B | METRONIDAZOLE TAB 500 MG              | 365  | 4379 | SINGLE DOSE MAXIMUM | 16.67 | MG/KG   |
| B | METRONIDAZOLE TAB 500 MG              | 365  | 4379 | SINGLE DOSE MINIMUM | 1.25  | MG/KG   |
| B | METRONIDAZOLE TAB 500 MG              | 365  | 4379 | TOTAL DAILY DOSE    | 50    | MG/KG   |
| B | METRONIDAZOLE TAB 500 MG              | 4380 | 6570 | DAILY FREQ MAXIMUM  | 4     | DOSE(S) |
| B | METRONIDAZOLE TAB 500 MG              | 4380 | 6570 | DAILY FREQ MINIMUM  | 1     | DOSE(S) |
| B | METRONIDAZOLE TAB 500 MG              | 4380 | 6570 | SINGLE DOSE MAXIMUM | 2000  | MG      |
| B | METRONIDAZOLE TAB 500 MG              | 4380 | 6570 | SINGLE DOSE MINIMUM | 250   | MG      |
| B | METRONIDAZOLE TAB 500 MG              | 4380 | 6570 | TOTAL DAILY DOSE    | 2400  | MG      |
| C | MORPHINE SULFATE (PF) 1 MG/ML IJ SOLN | 0    | 29   | DAILY FREQ MAXIMUM  | 8     | DOSE(S) |
| C | MORPHINE SULFATE (PF) 1 MG/ML IJ SOLN | 0    | 29   | DAILY FREQ MINIMUM  | 1     | DOSE(S) |
| C | MORPHINE SULFATE (PF) 1 MG/ML IJ SOLN | 0    | 29   | SINGLE DOSE MAXIMUM | 0.2   | MG/KG   |
| C | MORPHINE SULFATE (PF) 1 MG/ML IJ SOLN | 0    | 29   | SINGLE DOSE MINIMUM | 0.03  | MG/KG   |

|     |                                       |      |      |                     |         |         |
|-----|---------------------------------------|------|------|---------------------|---------|---------|
| C   | MORPHINE SULFATE (PF) 1 MG/ML IJ SOLN | 0    | 29   | TOTAL DAILY DOSE    | 1.2     | MG/KG   |
| C   | MORPHINE SULFATE (PF) 1 MG/ML IJ SOLN | 30   | 179  | DAILY FREQ MAXIMUM  | 12      | DOSE(S) |
| C   | MORPHINE SULFATE (PF) 1 MG/ML IJ SOLN | 30   | 179  | DAILY FREQ MINIMUM  | 1       | DOSE(S) |
| C   | MORPHINE SULFATE (PF) 1 MG/ML IJ SOLN | 30   | 179  | SINGLE DOSE MAXIMUM | 0.2     | MG/KG   |
| C   | MORPHINE SULFATE (PF) 1 MG/ML IJ SOLN | 30   | 179  | SINGLE DOSE MINIMUM | 0.05    | MG/KG   |
| C   | MORPHINE SULFATE (PF) 1 MG/ML IJ SOLN | 30   | 179  | TOTAL DAILY DOSE    | 2.4     | MG/KG   |
| C   | MORPHINE SULFATE (PF) 1 MG/ML IJ SOLN | 180  | 364  | DAILY FREQ MAXIMUM  | 12      | DOSE(S) |
| C   | MORPHINE SULFATE (PF) 1 MG/ML IJ SOLN | 180  | 364  | DAILY FREQ MINIMUM  | 1       | DOSE(S) |
| C   | MORPHINE SULFATE (PF) 1 MG/ML IJ SOLN | 180  | 364  | SINGLE DOSE MAXIMUM | 0.2     | MG/KG   |
| C   | MORPHINE SULFATE (PF) 1 MG/ML IJ SOLN | 180  | 364  | SINGLE DOSE MINIMUM | 0.05    | MG/KG   |
| C   | MORPHINE SULFATE (PF) 1 MG/ML IJ SOLN | 180  | 364  | TOTAL DAILY DOSE    | 2.4     | MG/KG   |
| C   | MORPHINE SULFATE (PF) 1 MG/ML IJ SOLN | 365  | 2189 | DAILY FREQ MAXIMUM  | 12      | DOSE(S) |
| C   | MORPHINE SULFATE (PF) 1 MG/ML IJ SOLN | 365  | 2189 | DAILY FREQ MINIMUM  | 1       | DOSE(S) |
| C   | MORPHINE SULFATE (PF) 1 MG/ML IJ SOLN | 365  | 2189 | SINGLE DOSE MAXIMUM | 0.2     | MG/KG   |
| C   | MORPHINE SULFATE (PF) 1 MG/ML IJ SOLN | 365  | 2189 | SINGLE DOSE MINIMUM | 0.05    | MG/KG   |
| C   | MORPHINE SULFATE (PF) 1 MG/ML IJ SOLN | 365  | 2189 | TOTAL DAILY DOSE    | 2.4     | MG/KG   |
| C   | MORPHINE SULFATE (PF) 1 MG/ML IJ SOLN | 2190 | 4379 | DAILY FREQ MAXIMUM  | 12      | DOSE(S) |
| C   | MORPHINE SULFATE (PF) 1 MG/ML IJ SOLN | 2190 | 4379 | DAILY FREQ MINIMUM  | 1       | DOSE(S) |
| C   | MORPHINE SULFATE (PF) 1 MG/ML IJ SOLN | 2190 | 4379 | SINGLE DOSE MAXIMUM | 0.2     | MG/KG   |
| C   | MORPHINE SULFATE (PF) 1 MG/ML IJ SOLN | 2190 | 4379 | SINGLE DOSE MINIMUM | 0.05    | MG/KG   |
| C   | MORPHINE SULFATE (PF) 1 MG/ML IJ SOLN | 2190 | 4379 | TOTAL DAILY DOSE    | 2.4     | MG/KG   |
| C   | MORPHINE SULFATE (PF) 1 MG/ML IJ SOLN | 4380 | 6570 | DAILY FREQ MAXIMUM  | 24      | DOSE(S) |
| C   | MORPHINE SULFATE (PF) 1 MG/ML IJ SOLN | 4380 | 6570 | DAILY FREQ MINIMUM  | 1       | DOSE(S) |
| C   | MORPHINE SULFATE (PF) 1 MG/ML IJ SOLN | 4380 | 6570 | SINGLE DOSE MAXIMUM | 20      | MG      |
| C   | MORPHINE SULFATE (PF) 1 MG/ML IJ SOLN | 4380 | 6570 | SINGLE DOSE MINIMUM | 1       | MG      |
| C   | MORPHINE SULFATE (PF) 1 MG/ML IJ SOLN | 4380 | 6570 | TOTAL DAILY DOSE    | 240     | MG      |
| A,C | ONDANSETRON HCL 4 MG/2ML IJ SOLN      | 0    | 29   | DAILY FREQ MAXIMUM  | NO RULE |         |
| A,C | ONDANSETRON HCL 4 MG/2ML IJ SOLN      | 0    | 29   | DAILY FREQ MINIMUM  | NO RULE |         |
| A,C | ONDANSETRON HCL 4 MG/2ML IJ SOLN      | 0    | 29   | SINGLE DOSE MAXIMUM | NO RULE |         |
| A,C | ONDANSETRON HCL 4 MG/2ML IJ SOLN      | 0    | 29   | SINGLE DOSE MINIMUM | NO RULE |         |
| A,C | ONDANSETRON HCL 4 MG/2ML IJ SOLN      | 0    | 29   | TOTAL DAILY DOSE    | NO RULE |         |
| A,C | ONDANSETRON HCL 4 MG/2ML IJ SOLN      | 30   | 179  | DAILY FREQ MAXIMUM  | NO RULE |         |
| A,C | ONDANSETRON HCL 4 MG/2ML IJ SOLN      | 30   | 179  | DAILY FREQ MINIMUM  | NO RULE |         |
| A,C | ONDANSETRON HCL 4 MG/2ML IJ SOLN      | 30   | 179  | SINGLE DOSE MAXIMUM | NO RULE |         |

|     |                                      |      |      |                     |         |         |
|-----|--------------------------------------|------|------|---------------------|---------|---------|
| A,C | ONDANSETRON HCL 4 MG/2ML IJ SOLN     | 30   | 179  | SINGLE DOSE MINIMUM | NO RULE |         |
| A,C | ONDANSETRON HCL 4 MG/2ML IJ SOLN     | 30   | 179  | TOTAL DAILY DOSE    | NO RULE |         |
| A,C | ONDANSETRON HCL 4 MG/2ML IJ SOLN     | 180  | 729  | DAILY FREQ MAXIMUM  | 3       | DOSE(S) |
| A,C | ONDANSETRON HCL 4 MG/2ML IJ SOLN     | 180  | 729  | DAILY FREQ MINIMUM  | 1       | DOSE(S) |
| A,C | ONDANSETRON HCL 4 MG/2ML IJ SOLN     | 180  | 729  | SINGLE DOSE MAXIMUM | 0.45    | MG/KG   |
| A,C | ONDANSETRON HCL 4 MG/2ML IJ SOLN     | 180  | 729  | SINGLE DOSE MINIMUM | 0.15    | MG/KG   |
| A,C | ONDANSETRON HCL 4 MG/2ML IJ SOLN     | 180  | 729  | TOTAL DAILY DOSE    | 0.15    | MG/KG   |
| A,C | ONDANSETRON HCL 4 MG/2ML IJ SOLN     | 730  | 1459 | DAILY FREQ MAXIMUM  | 3       | DOSE(S) |
| A,C | ONDANSETRON HCL 4 MG/2ML IJ SOLN     | 730  | 1459 | DAILY FREQ MINIMUM  | 1       | DOSE(S) |
| A,C | ONDANSETRON HCL 4 MG/2ML IJ SOLN     | 730  | 1459 | SINGLE DOSE MAXIMUM | 0.45    | MG/KG   |
| A,C | ONDANSETRON HCL 4 MG/2ML IJ SOLN     | 730  | 1459 | SINGLE DOSE MINIMUM | 0.15    | MG/KG   |
| A,C | ONDANSETRON HCL 4 MG/2ML IJ SOLN     | 730  | 1459 | TOTAL DAILY DOSE    | 0.15    | MG/KG   |
| A,C | ONDANSETRON HCL 4 MG/2ML IJ SOLN     | 1460 | 4379 | DAILY FREQ MAXIMUM  | 3       | DOSE(S) |
| A,C | ONDANSETRON HCL 4 MG/2ML IJ SOLN     | 1460 | 4379 | DAILY FREQ MINIMUM  | 1       | DOSE(S) |
| A,C | ONDANSETRON HCL 4 MG/2ML IJ SOLN     | 1460 | 4379 | SINGLE DOSE MAXIMUM | 0.45    | MG/KG   |
| A,C | ONDANSETRON HCL 4 MG/2ML IJ SOLN     | 1460 | 4379 | SINGLE DOSE MINIMUM | 0.15    | MG/KG   |
| A,C | ONDANSETRON HCL 4 MG/2ML IJ SOLN     | 1460 | 4379 | TOTAL DAILY DOSE    | 0.15    | MG/KG   |
| A,C | ONDANSETRON HCL 4 MG/2ML IJ SOLN     | 4380 | 6570 | DAILY FREQ MAXIMUM  | 6       | DOSE(S) |
| A,C | ONDANSETRON HCL 4 MG/2ML IJ SOLN     | 4380 | 6570 | DAILY FREQ MINIMUM  | 1       | DOSE(S) |
| A,C | ONDANSETRON HCL 4 MG/2ML IJ SOLN     | 4380 | 6570 | SINGLE DOSE MAXIMUM | 0.15    | MG/KG   |
| A,C | ONDANSETRON HCL 4 MG/2ML IJ SOLN     | 4380 | 6570 | SINGLE DOSE MINIMUM | 0.15    | MG/KG   |
| A,C | ONDANSETRON HCL 4 MG/2ML IJ SOLN     | 4380 | 6570 | TOTAL DAILY DOSE    | 0.45    | MG/KG   |
| B   | OXYBUTYNIN CHLORIDE 5 MG/5ML PO SYRP | 0    | 364  | DAILY FREQ MAXIMUM  | NO RULE |         |
| B   | OXYBUTYNIN CHLORIDE 5 MG/5ML PO SYRP | 0    | 364  | DAILY FREQ MINIMUM  | NO RULE |         |
| B   | OXYBUTYNIN CHLORIDE 5 MG/5ML PO SYRP | 0    | 364  | SINGLE DOSE MAXIMUM | NO RULE |         |
| B   | OXYBUTYNIN CHLORIDE 5 MG/5ML PO SYRP | 0    | 364  | SINGLE DOSE MINIMUM | NO RULE |         |
| B   | OXYBUTYNIN CHLORIDE 5 MG/5ML PO SYRP | 0    | 364  | TOTAL DAILY DOSE    | NO RULE |         |
| B   | OXYBUTYNIN CHLORIDE 5 MG/5ML PO SYRP | 365  | 1824 | DAILY FREQ MAXIMUM  | 3       | DOSE(S) |
| B   | OXYBUTYNIN CHLORIDE 5 MG/5ML PO SYRP | 365  | 1824 | DAILY FREQ MINIMUM  | 2       | DOSE(S) |
| B   | OXYBUTYNIN CHLORIDE 5 MG/5ML PO SYRP | 365  | 1824 | SINGLE DOSE MAXIMUM | 0.6     | MG/KG   |
| B   | OXYBUTYNIN CHLORIDE 5 MG/5ML PO SYRP | 365  | 1824 | SINGLE DOSE MINIMUM | 0.2     | MG/KG   |
| B   | OXYBUTYNIN CHLORIDE 5 MG/5ML PO SYRP | 365  | 1824 | TOTAL DAILY DOSE    | 0.6     | MG/KG   |
| B   | OXYBUTYNIN CHLORIDE 5 MG/5ML PO SYRP | 1825 | 2189 | DAILY FREQ MAXIMUM  | 3       | DOSE(S) |
| B   | OXYBUTYNIN CHLORIDE 5 MG/5ML PO SYRP | 1825 | 2189 | DAILY FREQ MINIMUM  | 2       | DOSE(S) |



|     |                                      |      |      |                     |         |         |
|-----|--------------------------------------|------|------|---------------------|---------|---------|
| B   | OXYBUTYNIN CHLORIDE 5 MG/5ML PO SYRP | 1825 | 2189 | SINGLE DOSE MAXIMUM | 0.6     | MG/KG   |
| B   | OXYBUTYNIN CHLORIDE 5 MG/5ML PO SYRP | 1825 | 2189 | SINGLE DOSE MINIMUM | 0.2     | MG/KG   |
| B   | OXYBUTYNIN CHLORIDE 5 MG/5ML PO SYRP | 1825 | 2189 | TOTAL DAILY DOSE    | 0.6     | MG/KG   |
| B   | OXYBUTYNIN CHLORIDE 5 MG/5ML PO SYRP | 2190 | 4379 | DAILY FREQ MAXIMUM  | 3       | DOSE(S) |
| B   | OXYBUTYNIN CHLORIDE 5 MG/5ML PO SYRP | 2190 | 4379 | DAILY FREQ MINIMUM  | 2       | DOSE(S) |
| B   | OXYBUTYNIN CHLORIDE 5 MG/5ML PO SYRP | 2190 | 4379 | SINGLE DOSE MAXIMUM | 5       | MG      |
| B   | OXYBUTYNIN CHLORIDE 5 MG/5ML PO SYRP | 2190 | 4379 | SINGLE DOSE MINIMUM | 5       | MG      |
| B   | OXYBUTYNIN CHLORIDE 5 MG/5ML PO SYRP | 2190 | 4379 | TOTAL DAILY DOSE    | 15      | MG      |
| B   | OXYBUTYNIN CHLORIDE 5 MG/5ML PO SYRP | 4380 | 6570 | DAILY FREQ MAXIMUM  | 4       | DOSE(S) |
| B   | OXYBUTYNIN CHLORIDE 5 MG/5ML PO SYRP | 4380 | 6570 | DAILY FREQ MINIMUM  | 2       | DOSE(S) |
| B   | OXYBUTYNIN CHLORIDE 5 MG/5ML PO SYRP | 4380 | 6570 | SINGLE DOSE MAXIMUM | 5       | MG      |
| B   | OXYBUTYNIN CHLORIDE 5 MG/5ML PO SYRP | 4380 | 6570 | SINGLE DOSE MINIMUM | 5       | MG      |
| B   | OXYBUTYNIN CHLORIDE 5 MG/5ML PO SYRP | 4380 | 6570 | TOTAL DAILY DOSE    | 20      | MG      |
| A,C | OXYMETAZOLINE HCL 0.05 % NA SOLN     | 0    | 29   | DAILY FREQ MAXIMUM  | NO RULE |         |
| A,C | OXYMETAZOLINE HCL 0.05 % NA SOLN     | 0    | 29   | DAILY FREQ MINIMUM  | NO RULE |         |
| A,C | OXYMETAZOLINE HCL 0.05 % NA SOLN     | 0    | 29   | SINGLE DOSE MAXIMUM | NO RULE |         |
| A,C | OXYMETAZOLINE HCL 0.05 % NA SOLN     | 0    | 29   | SINGLE DOSE MINIMUM | NO RULE |         |
| A,C | OXYMETAZOLINE HCL 0.05 % NA SOLN     | 0    | 29   | TOTAL DAILY DOSE    | NO RULE |         |
| A,C | OXYMETAZOLINE HCL 0.05 % NA SOLN     | 30   | 364  | DAILY FREQ MAXIMUM  | NO RULE |         |
| A,C | OXYMETAZOLINE HCL 0.05 % NA SOLN     | 30   | 364  | DAILY FREQ MINIMUM  | NO RULE |         |
| A,C | OXYMETAZOLINE HCL 0.05 % NA SOLN     | 30   | 364  | SINGLE DOSE MAXIMUM | NO RULE |         |
| A,C | OXYMETAZOLINE HCL 0.05 % NA SOLN     | 30   | 364  | SINGLE DOSE MINIMUM | NO RULE |         |
| A,C | OXYMETAZOLINE HCL 0.05 % NA SOLN     | 30   | 364  | TOTAL DAILY DOSE    | NO RULE |         |
| A,C | OXYMETAZOLINE HCL 0.05 % NA SOLN     | 365  | 1824 | DAILY FREQ MAXIMUM  | NO RULE |         |
| A,C | OXYMETAZOLINE HCL 0.05 % NA SOLN     | 365  | 1824 | DAILY FREQ MINIMUM  | NO RULE |         |
| A,C | OXYMETAZOLINE HCL 0.05 % NA SOLN     | 365  | 1824 | SINGLE DOSE MAXIMUM | NO RULE |         |
| A,C | OXYMETAZOLINE HCL 0.05 % NA SOLN     | 365  | 1824 | SINGLE DOSE MINIMUM | NO RULE |         |
| A,C | OXYMETAZOLINE HCL 0.05 % NA SOLN     | 365  | 1824 | TOTAL DAILY DOSE    | NO RULE |         |
| A,C | OXYMETAZOLINE HCL 0.05 % NA SOLN     | 1825 | 2189 | DAILY FREQ MAXIMUM  | NO RULE |         |
| A,C | OXYMETAZOLINE HCL 0.05 % NA SOLN     | 1825 | 2189 | DAILY FREQ MINIMUM  | NO RULE |         |
| A,C | OXYMETAZOLINE HCL 0.05 % NA SOLN     | 1825 | 2189 | SINGLE DOSE MAXIMUM | NO RULE |         |
| A,C | OXYMETAZOLINE HCL 0.05 % NA SOLN     | 1825 | 2189 | SINGLE DOSE MINIMUM | NO RULE |         |
| A,C | OXYMETAZOLINE HCL 0.05 % NA SOLN     | 1825 | 2189 | TOTAL DAILY DOSE    | NO RULE |         |
| A,C | OXYMETAZOLINE HCL 0.05 % NA SOLN     | 2190 | 6570 | DAILY FREQ MAXIMUM  | 2       | DOSE(S) |

|     |                                    |      |      |                     |         |          |
|-----|------------------------------------|------|------|---------------------|---------|----------|
| A,C | OXYMETAZOLINE HCL 0.05 % NA SOLN   | 2190 | 6570 | DAILY FREQ MINIMUM  | 1       | DOSE(S)  |
| A,C | OXYMETAZOLINE HCL 0.05 % NA SOLN   | 2190 | 6570 | SINGLE DOSE MAXIMUM | 3       | SPRAY(S) |
| A,C | OXYMETAZOLINE HCL 0.05 % NA SOLN   | 2190 | 6570 | SINGLE DOSE MINIMUM | 1       | SPRAY(S) |
| A,C | OXYMETAZOLINE HCL 0.05 % NA SOLN   | 2190 | 6570 | TOTAL DAILY DOSE    | 6       | SPRAY(S) |
| B   | PARICALCITOL IV SOLN 5 MCG/ML      | 0    | 1824 | DAILY FREQ MAXIMUM  | NO RULE |          |
| B   | PARICALCITOL IV SOLN 5 MCG/ML      | 0    | 1824 | DAILY FREQ MINIMUM  | NO RULE |          |
| B   | PARICALCITOL IV SOLN 5 MCG/ML      | 0    | 1824 | SINGLE DOSE MAXIMUM | NO RULE |          |
| B   | PARICALCITOL IV SOLN 5 MCG/ML      | 0    | 1824 | SINGLE DOSE MINIMUM | NO RULE |          |
| B   | PARICALCITOL IV SOLN 5 MCG/ML      | 0    | 1824 | TOTAL DAILY DOSE    | NO RULE |          |
| B   | PARICALCITOL IV SOLN 5 MCG/ML      | 1825 | 6570 | DAILY FREQ MAXIMUM  | 0.5     | DOSE(S)  |
| B   | PARICALCITOL IV SOLN 5 MCG/ML      | 1825 | 6570 | DAILY FREQ MINIMUM  | 0.429   | DOSE(S)  |
| B   | PARICALCITOL IV SOLN 5 MCG/ML      | 1825 | 6570 | SINGLE DOSE MAXIMUM | 0.12    | MCG/KG   |
| B   | PARICALCITOL IV SOLN 5 MCG/ML      | 1825 | 6570 | SINGLE DOSE MINIMUM | 0.0171  | MCG/KG   |
| B   | PARICALCITOL IV SOLN 5 MCG/ML      | 1825 | 6570 | TOTAL DAILY DOSE    | 0.24    | MCG/KG   |
| B   | PEN TOBARBITAL SODIUM INJ 50 MG/ML | 0    | 29   | DAILY FREQ MAXIMUM  | 8       | DOSE(S)  |
| B   | PEN TOBARBITAL SODIUM INJ 50 MG/ML | 0    | 29   | DAILY FREQ MINIMUM  | 1       | DOSE(S)  |
| B   | PEN TOBARBITAL SODIUM INJ 50 MG/ML | 0    | 29   | SINGLE DOSE MAXIMUM | 2       | MG/KG    |
| B   | PEN TOBARBITAL SODIUM INJ 50 MG/ML | 0    | 29   | SINGLE DOSE MINIMUM | 1       | MG/KG    |
| B   | PEN TOBARBITAL SODIUM INJ 50 MG/ML | 0    | 29   | TOTAL DAILY DOSE    | 9       | MG/KG    |
| B   | PEN TOBARBITAL SODIUM INJ 50 MG/ML | 30   | 364  | DAILY FREQ MAXIMUM  | 8       | DOSE(S)  |
| B   | PEN TOBARBITAL SODIUM INJ 50 MG/ML | 30   | 364  | DAILY FREQ MINIMUM  | 1       | DOSE(S)  |
| B   | PEN TOBARBITAL SODIUM INJ 50 MG/ML | 30   | 364  | SINGLE DOSE MAXIMUM | 2       | MG/KG    |
| B   | PEN TOBARBITAL SODIUM INJ 50 MG/ML | 30   | 364  | SINGLE DOSE MINIMUM | 1       | MG/KG    |
| B   | PEN TOBARBITAL SODIUM INJ 50 MG/ML | 30   | 364  | TOTAL DAILY DOSE    | 9       | MG/KG    |
| B   | PEN TOBARBITAL SODIUM INJ 50 MG/ML | 365  | 4379 | DAILY FREQ MAXIMUM  | 3       | DOSE(S)  |
| B   | PEN TOBARBITAL SODIUM INJ 50 MG/ML | 365  | 4379 | DAILY FREQ MINIMUM  | 1       | DOSE(S)  |
| B   | PEN TOBARBITAL SODIUM INJ 50 MG/ML | 365  | 4379 | SINGLE DOSE MAXIMUM | 6       | MG/KG    |
| B   | PEN TOBARBITAL SODIUM INJ 50 MG/ML | 365  | 4379 | SINGLE DOSE MINIMUM | 2       | MG/KG    |
| B   | PEN TOBARBITAL SODIUM INJ 50 MG/ML | 365  | 4379 | TOTAL DAILY DOSE    | 100     | MG       |
| B   | PEN TOBARBITAL SODIUM INJ 50 MG/ML | 4380 | 6570 | DAILY FREQ MAXIMUM  | 8       | DOSE(S)  |
| B   | PEN TOBARBITAL SODIUM INJ 50 MG/ML | 4380 | 6570 | DAILY FREQ MINIMUM  | 1       | DOSE(S)  |
| B   | PEN TOBARBITAL SODIUM INJ 50 MG/ML | 4380 | 6570 | SINGLE DOSE MAXIMUM | 400     | MG       |
| B   | PEN TOBARBITAL SODIUM INJ 50 MG/ML | 4380 | 6570 | SINGLE DOSE MINIMUM | 200     | MG       |
| B   | PEN TOBARBITAL SODIUM INJ 50 MG/ML | 4380 | 6570 | TOTAL DAILY DOSE    | 400     | MG       |

|       |                                                        |      |      |                     |         |         |
|-------|--------------------------------------------------------|------|------|---------------------|---------|---------|
| A     | POLYETHYLENE GLYCOL 3350 ORAL POWDER                   | 0    | 179  | DAILY FREQ MAXIMUM  | NO RULE |         |
| A     | POLYETHYLENE GLYCOL 3350 ORAL POWDER                   | 0    | 179  | DAILY FREQ MINIMUM  | NO RULE |         |
| A     | POLYETHYLENE GLYCOL 3350 ORAL POWDER                   | 0    | 179  | SINGLE DOSE MAXIMUM | NO RULE |         |
| A     | POLYETHYLENE GLYCOL 3350 ORAL POWDER                   | 0    | 179  | SINGLE DOSE MINIMUM | NO RULE |         |
| A     | POLYETHYLENE GLYCOL 3350 ORAL POWDER                   | 0    | 179  | TOTAL DAILY DOSE    | NO RULE |         |
| A     | POLYETHYLENE GLYCOL 3350 ORAL POWDER                   | 180  | 729  | DAILY FREQ MAXIMUM  | NO RULE |         |
| A     | POLYETHYLENE GLYCOL 3350 ORAL POWDER                   | 180  | 729  | DAILY FREQ MINIMUM  | NO RULE |         |
| A     | POLYETHYLENE GLYCOL 3350 ORAL POWDER                   | 180  | 729  | SINGLE DOSE MAXIMUM | NO RULE |         |
| A     | POLYETHYLENE GLYCOL 3350 ORAL POWDER                   | 180  | 729  | SINGLE DOSE MINIMUM | NO RULE |         |
| A     | POLYETHYLENE GLYCOL 3350 ORAL POWDER                   | 180  | 729  | TOTAL DAILY DOSE    | NO RULE |         |
| A     | POLYETHYLENE GLYCOL 3350 ORAL POWDER                   | 730  | 4379 | DAILY FREQ MAXIMUM  | 2       | DOSE(S) |
| A     | POLYETHYLENE GLYCOL 3350 ORAL POWDER                   | 730  | 4379 | DAILY FREQ MINIMUM  | 1       | DOSE(S) |
| A     | POLYETHYLENE GLYCOL 3350 ORAL POWDER                   | 730  | 4379 | SINGLE DOSE MAXIMUM | 1.5     | GM/KG   |
| A     | POLYETHYLENE GLYCOL 3350 ORAL POWDER                   | 730  | 4379 | SINGLE DOSE MINIMUM | 0.75    | GM/KG   |
| A     | POLYETHYLENE GLYCOL 3350 ORAL POWDER                   | 730  | 4379 | TOTAL DAILY DOSE    | 1.5     | GM/KG   |
| A     | POLYETHYLENE GLYCOL 3350 ORAL POWDER                   | 4380 | 6204 | DAILY FREQ MAXIMUM  | 1       | DOSE(S) |
| A     | POLYETHYLENE GLYCOL 3350 ORAL POWDER                   | 4380 | 6204 | DAILY FREQ MINIMUM  | 1       | DOSE(S) |
| A     | POLYETHYLENE GLYCOL 3350 ORAL POWDER                   | 4380 | 6204 | SINGLE DOSE MAXIMUM | 17      | GM      |
| A     | POLYETHYLENE GLYCOL 3350 ORAL POWDER                   | 4380 | 6204 | SINGLE DOSE MINIMUM | 17      | GM      |
| A     | POLYETHYLENE GLYCOL 3350 ORAL POWDER                   | 4380 | 6204 | TOTAL DAILY DOSE    | 17      | GM      |
| A     | POLYETHYLENE GLYCOL 3350 ORAL POWDER                   | 6205 | 6570 | DAILY FREQ MAXIMUM  | 1       | DOSE(S) |
| A     | POLYETHYLENE GLYCOL 3350 ORAL POWDER                   | 6205 | 6570 | DAILY FREQ MINIMUM  | 1       | DOSE(S) |
| A     | POLYETHYLENE GLYCOL 3350 ORAL POWDER                   | 6205 | 6570 | SINGLE DOSE MAXIMUM | 17      | GM      |
| A     | POLYETHYLENE GLYCOL 3350 ORAL POWDER                   | 6205 | 6570 | SINGLE DOSE MINIMUM | 17      | GM      |
| A     | POLYETHYLENE GLYCOL 3350 ORAL POWDER                   | 6205 | 6570 | TOTAL DAILY DOSE    | 17      | GM      |
| A,B,C | PREDNISOLONE SYRUP 15 MG/5ML (USP SOLUTION EQUIVALENT) | 0    | 29   | DAILY FREQ MAXIMUM  | NO RULE |         |
| A,B,C | PREDNISOLONE SYRUP 15 MG/5ML (USP SOLUTION EQUIVALENT) | 0    | 29   | DAILY FREQ MINIMUM  | NO RULE |         |
| A,B,C | PREDNISOLONE SYRUP 15 MG/5ML (USP SOLUTION EQUIVALENT) | 0    | 29   | SINGLE DOSE MAXIMUM | NO RULE |         |
| A,B,C | PREDNISOLONE SYRUP 15 MG/5ML (USP SOLUTION EQUIVALENT) | 0    | 29   | SINGLE DOSE MINIMUM | NO RULE |         |
| A,B,C | PREDNISOLONE SYRUP 15 MG/5ML (USP SOLUTION EQUIVALENT) | 0    | 29   | TOTAL DAILY DOSE    | NO RULE |         |
| A,B,C | PREDNISOLONE SYRUP 15 MG/5ML (USP SOLUTION EQUIVALENT) | 30   | 364  | DAILY FREQ MAXIMUM  | 4       | DOSE(S) |
| A,B,C | PREDNISOLONE SYRUP 15 MG/5ML (USP SOLUTION EQUIVALENT) | 30   | 364  | DAILY FREQ MINIMUM  | 0.5     | DOSE(S) |
| A,B,C | PREDNISOLONE SYRUP 15 MG/5ML (USP SOLUTION EQUIVALENT) | 30   | 364  | SINGLE DOSE MAXIMUM | 2       | MG/KG   |
| A,B,C | PREDNISOLONE SYRUP 15 MG/5ML (USP SOLUTION EQUIVALENT) | 30   | 364  | SINGLE DOSE MINIMUM | 0.14    | MG/KG   |

|       |                                                        |      |      |                     |         |         |
|-------|--------------------------------------------------------|------|------|---------------------|---------|---------|
| A,B,C | PREDNISOLONE SYRUP 15 MG/5ML (USP SOLUTION EQUIVALENT) | 30   | 364  | TOTAL DAILY DOSE    | 2       | MG/KG   |
| A,B,C | PREDNISOLONE SYRUP 15 MG/5ML (USP SOLUTION EQUIVALENT) | 365  | 4379 | DAILY FREQ MAXIMUM  | 4       | DOSE(S) |
| A,B,C | PREDNISOLONE SYRUP 15 MG/5ML (USP SOLUTION EQUIVALENT) | 365  | 4379 | DAILY FREQ MINIMUM  | 0.5     | DOSE(S) |
| A,B,C | PREDNISOLONE SYRUP 15 MG/5ML (USP SOLUTION EQUIVALENT) | 365  | 4379 | SINGLE DOSE MAXIMUM | 2       | MG/KG   |
| A,B,C | PREDNISOLONE SYRUP 15 MG/5ML (USP SOLUTION EQUIVALENT) | 365  | 4379 | SINGLE DOSE MINIMUM | 0.14    | MG/KG   |
| A,B,C | PREDNISOLONE SYRUP 15 MG/5ML (USP SOLUTION EQUIVALENT) | 365  | 4379 | TOTAL DAILY DOSE    | 2       | MG/KG   |
| A,B,C | PREDNISOLONE SYRUP 15 MG/5ML (USP SOLUTION EQUIVALENT) | 4380 | 6570 | DAILY FREQ MAXIMUM  | 4       | DOSE(S) |
| A,B,C | PREDNISOLONE SYRUP 15 MG/5ML (USP SOLUTION EQUIVALENT) | 4380 | 6570 | DAILY FREQ MINIMUM  | 0.5     | DOSE(S) |
| A,B,C | PREDNISOLONE SYRUP 15 MG/5ML (USP SOLUTION EQUIVALENT) | 4380 | 6570 | SINGLE DOSE MAXIMUM | 60      | MG      |
| A,B,C | PREDNISOLONE SYRUP 15 MG/5ML (USP SOLUTION EQUIVALENT) | 4380 | 6570 | SINGLE DOSE MINIMUM | 5       | MG      |
| A,B,C | PREDNISOLONE SYRUP 15 MG/5ML (USP SOLUTION EQUIVALENT) | 4380 | 6570 | TOTAL DAILY DOSE    | 80      | MG      |
| B     | ROCURONIUM BROMIDE IV SOLN 50 MG/5ML (10 MG/ML)        | 0    | 29   | DAILY FREQ MAXIMUM  | NO RULE |         |
| B     | ROCURONIUM BROMIDE IV SOLN 50 MG/5ML (10 MG/ML)        | 0    | 29   | DAILY FREQ MINIMUM  | NO RULE |         |
| B     | ROCURONIUM BROMIDE IV SOLN 50 MG/5ML (10 MG/ML)        | 0    | 29   | SINGLE DOSE MAXIMUM | NO RULE |         |
| B     | ROCURONIUM BROMIDE IV SOLN 50 MG/5ML (10 MG/ML)        | 0    | 29   | SINGLE DOSE MINIMUM | NO RULE |         |
| B     | ROCURONIUM BROMIDE IV SOLN 50 MG/5ML (10 MG/ML)        | 0    | 29   | TOTAL DAILY DOSE    | NO RULE |         |
| B     | ROCURONIUM BROMIDE IV SOLN 50 MG/5ML (10 MG/ML)        | 30   | 89   | DAILY FREQ MAXIMUM  | NO RULE |         |
| B     | ROCURONIUM BROMIDE IV SOLN 50 MG/5ML (10 MG/ML)        | 30   | 89   | DAILY FREQ MINIMUM  | NO RULE |         |
| B     | ROCURONIUM BROMIDE IV SOLN 50 MG/5ML (10 MG/ML)        | 30   | 89   | SINGLE DOSE MAXIMUM | NO RULE |         |
| B     | ROCURONIUM BROMIDE IV SOLN 50 MG/5ML (10 MG/ML)        | 30   | 89   | SINGLE DOSE MINIMUM | NO RULE |         |
| B     | ROCURONIUM BROMIDE IV SOLN 50 MG/5ML (10 MG/ML)        | 30   | 89   | TOTAL DAILY DOSE    | NO RULE |         |
| B     | ROCURONIUM BROMIDE IV SOLN 50 MG/5ML (10 MG/ML)        | 90   | 364  | DAILY FREQ MAXIMUM  | 10      | DOSE(S) |
| B     | ROCURONIUM BROMIDE IV SOLN 50 MG/5ML (10 MG/ML)        | 90   | 364  | DAILY FREQ MINIMUM  | 1       | DOSE(S) |
| B     | ROCURONIUM BROMIDE IV SOLN 50 MG/5ML (10 MG/ML)        | 90   | 364  | SINGLE DOSE MAXIMUM | 0.6     | MG/KG   |
| B     | ROCURONIUM BROMIDE IV SOLN 50 MG/5ML (10 MG/ML)        | 90   | 364  | SINGLE DOSE MINIMUM | 0.5     | MG/KG   |
| B     | ROCURONIUM BROMIDE IV SOLN 50 MG/5ML (10 MG/ML)        | 90   | 364  | TOTAL DAILY DOSE    | 6       | MG/KG   |
| B     | ROCURONIUM BROMIDE IV SOLN 50 MG/5ML (10 MG/ML)        | 365  | 4379 | DAILY FREQ MAXIMUM  | 10      | DOSE(S) |
| B     | ROCURONIUM BROMIDE IV SOLN 50 MG/5ML (10 MG/ML)        | 365  | 4379 | DAILY FREQ MINIMUM  | 1       | DOSE(S) |
| B     | ROCURONIUM BROMIDE IV SOLN 50 MG/5ML (10 MG/ML)        | 365  | 4379 | SINGLE DOSE MAXIMUM | 0.125   | MG/KG   |
| B     | ROCURONIUM BROMIDE IV SOLN 50 MG/5ML (10 MG/ML)        | 365  | 4379 | SINGLE DOSE MINIMUM | 0.075   | MG/KG   |
| B     | ROCURONIUM BROMIDE IV SOLN 50 MG/5ML (10 MG/ML)        | 365  | 4379 | TOTAL DAILY DOSE    | 1.25    | MG/KG   |
| B     | ROCURONIUM BROMIDE IV SOLN 50 MG/5ML (10 MG/ML)        | 4380 | 5109 | DAILY FREQ MAXIMUM  | 10      | DOSE(S) |
| B     | ROCURONIUM BROMIDE IV SOLN 50 MG/5ML (10 MG/ML)        | 4380 | 5109 | DAILY FREQ MINIMUM  | 1       | DOSE(S) |
| B     | ROCURONIUM BROMIDE IV SOLN 50 MG/5ML (10 MG/ML)        | 4380 | 5109 | SINGLE DOSE MAXIMUM | 0.125   | MG/KG   |

|   |                                                    |      |      |                     |         |               |
|---|----------------------------------------------------|------|------|---------------------|---------|---------------|
| B | ROCURONIUM BROMIDE IV SOLN 50 MG/5ML (10 MG/ML)    | 4380 | 5109 | SINGLE DOSE MINIMUM | 0.075   | MG/KG         |
| B | ROCURONIUM BROMIDE IV SOLN 50 MG/5ML (10 MG/ML)    | 4380 | 5109 | TOTAL DAILY DOSE    | 1.25    | MG/KG         |
| B | ROCURONIUM BROMIDE IV SOLN 50 MG/5ML (10 MG/ML)    | 5110 | 6570 | DAILY FREQ MAXIMUM  | 8       | DOSE(S)       |
| B | ROCURONIUM BROMIDE IV SOLN 50 MG/5ML (10 MG/ML)    | 5110 | 6570 | DAILY FREQ MINIMUM  | 1       | DOSE(S)       |
| B | ROCURONIUM BROMIDE IV SOLN 50 MG/5ML (10 MG/ML)    | 5110 | 6570 | SINGLE DOSE MAXIMUM | 0.2     | MG/KG         |
| B | ROCURONIUM BROMIDE IV SOLN 50 MG/5ML (10 MG/ML)    | 5110 | 6570 | SINGLE DOSE MINIMUM | 0.1     | MG/KG         |
| B | ROCURONIUM BROMIDE IV SOLN 50 MG/5ML (10 MG/ML)    | 5110 | 6570 | TOTAL DAILY DOSE    | 1.6     | MG/KG         |
| A | SILVER NITRATE-POTASSIUM NITRATE APPLICATOR 75-25% | 0    | 364  | DAILY FREQ MAXIMUM  | NO RULE |               |
| A | SILVER NITRATE-POTASSIUM NITRATE APPLICATOR 75-25% | 0    | 364  | DAILY FREQ MINIMUM  | NO RULE |               |
| A | SILVER NITRATE-POTASSIUM NITRATE APPLICATOR 75-25% | 0    | 364  | SINGLE DOSE MAXIMUM | NO RULE |               |
| A | SILVER NITRATE-POTASSIUM NITRATE APPLICATOR 75-25% | 0    | 364  | SINGLE DOSE MINIMUM | NO RULE |               |
| A | SILVER NITRATE-POTASSIUM NITRATE APPLICATOR 75-25% | 0    | 364  | TOTAL DAILY DOSE    | NO RULE |               |
| A | SILVER NITRATE-POTASSIUM NITRATE APPLICATOR 75-25% | 365  | 6570 | DAILY FREQ MAXIMUM  | 1       | DOSE(S)       |
| A | SILVER NITRATE-POTASSIUM NITRATE APPLICATOR 75-25% | 365  | 6570 | DAILY FREQ MINIMUM  | 1       | DOSE(S)       |
| A | SILVER NITRATE-POTASSIUM NITRATE APPLICATOR 75-25% | 365  | 6570 | SINGLE DOSE MAXIMUM | 1       | APPLICATOR(S) |
| A | SILVER NITRATE-POTASSIUM NITRATE APPLICATOR 75-25% | 365  | 6570 | SINGLE DOSE MINIMUM | 1       | APPLICATOR(S) |
| A | SILVER NITRATE-POTASSIUM NITRATE APPLICATOR 75-25% | 365  | 6570 | TOTAL DAILY DOSE    | 1       | APPLICATOR(S) |

- \* A = Most commonly alerted  
B = Highest alert override rate  
C = Most commonly prescribed
